# Supplementary material for: Temple syndrome in a patient with variably methylated CpGs at the primary MEG3/DLK1:IG-DMR and severely hypomethylated CpGs at the secondary MEG3:TSS-DMR
Source: PubMed Central journal article supplement (PMC6407230; doi:10.1186/s13148-019-0640-2), 2019-03-07
Supplement: 13148_2019_640_MOESM1_ESM.pdf [file 13148_2019_640_MOESM1_ESM.pdf]

## **Supplemental Materials**

**Temple syndrome in a patient with variably methylated CpGs at the primary *MEG3/DLK1*:IG-DMR and severely hypomethylated CpGs at the secondary *MEG3*:TSS-DMR**

### **Table of Contents**

**Supplemental Table S1**

**Supplemental Table S2**

**Supplemental Table S3**

**Supplemental Figure S1**

**Supplemental Figure S2**

**Supplemental Figure S3**

**Table S1** Primers utilized in this study.

| DMR/Locus                                  | Forward (5' → 3')                                                      | Sequence primer                                       | AT       |
|--------------------------------------------|------------------------------------------------------------------------|-------------------------------------------------------|----------|
| Chromosome                                 | Reverse (5' → 3')                                                      | Physical position                                     | CN       |
| <b>Pyrosequencing</b>                      |                                                                        |                                                       |          |
| <i>PLAGL1</i> :alt-TSS-DMR<br>6q24.2       | GGGGTAGTYGTGTTTATAGTTTAG<br>biotin-CCCAAACACCTACCCTAC                  | GGGTAGTYGTGTTTATAGTTTAGT<br>chr6: 144329214-144329359 | 55<br>45 |
| <i>PEG10</i> :TSS-DMR<br>7q21.3            | AGAAATTTGATTGYGTTTTGAGGAGAAT<br>biotin-ACCTTTAAACTTAATTTCCCAATTAT      | AGTTTGGYGAAAGGTT<br>chr7: 94285716-94286059           | 55<br>45 |
| <i>MEST</i> :alt-TSS-DMR<br>7q32.2         | GTGTGGTTGGYGGTTTTGGGATTA<br>biotin-ACACCCCTCCTCAAATA                   | TGTTTTGGGYGAAAATTTTAT<br>chr7: 130132206-130132348    | 55<br>45 |
| <i>H19/IGF2</i> :IG-DMR<br>11p15.5         | GTTYGGGGGTTTTGTATAGTATATGGGT<br>biotin-TCCCATAAATATCCTATCCCATAAAC      | GGTGTAGTTGTGGAAT<br>chr11: 2021039-2021317            | 54<br>45 |
| <i>KCNQ1OT1</i> :TSS-DMR<br>11p15.5        | GGATTTAGAATTAYGATGYGGATTTTA<br>biotin-TCCCATCTACACCTTATAAACA           | TTTTGAATTATTATGAGAATTATAG<br>chr11: 2720333-2720487   | 55<br>45 |
| <i>MEG3/DLKI</i> :IG-DMR<br>14q32.2        | ATTTGGTATTTGTAGTTTTATGTTAAGATG<br>biotin-AATCAAAACAACCTCAAATCCTTTATAAC | AATTGGGTTTGTAGTAG<br>chr14: 101275613-101275776       | 54<br>45 |
| <i>MEG3</i> :TSS-DMR<br>14q32.2            | TTGTGTTTGAATTTATTTGTTT<br>biotin-CCCCAAATTCTATAACAAATTACTCT            | GTGTTGAATTTATTTGTTT<br>chr14: 101292170-101292336     | 54<br>45 |
| <i>SNURF</i> :TSS-DMR<br>15q11.2           | GTTATGGTAGTGAGTATAGGGGGATGA<br>biotin-CCTCCCCCTACCTCCA                 | ATAGTGGTGGGGGTT<br>chr15: 25200788-25200897           | 54<br>45 |
| <i>GNAS A/B</i> :TSS-DMR<br>20q13.32       | GGGATATTTGAGATTTTGAAAGAA<br>biotin-AATACAAAACCTCCCTACT                 | GTATTTTTTTTATTGGGAGGA<br>chr20: 57463531-57463746     | 52<br>45 |
| <b>Bisulphite sequencing</b>               |                                                                        |                                                       |          |
| CG4 ( <i>MEG3/DLKI</i> :IG-DMR)<br>14q32.2 | TTTTATTATTGAATTGGGTTTGTAGT<br>ACAATTCCTACTACAAAATTTCAACA               | chr14:101275674-101275982                             | 57<br>35 |
| CG7 ( <i>MEG3</i> :TSS-DMR)<br>14q32.2     | TTGTGTTTGAATTTATTTGTTT<br>CCCCAAATTCTATAACAAATTACT                     | chr14:101292169-101292336                             | 57<br>35 |
| <b>Microsatellite analysis</b>             |                                                                        |                                                       |          |
| <i>D14S608</i><br>14q12                    | TAAAGGTTTATCCATGCTGTAGC<br>ACGTGGTACAGGTAGATAAATGG                     |                                                       | 57       |
| <i>D14S588</i><br>14q23-24.1               | GCCGAAAGAAAGAAAAAAGG<br>CGAATGCATACTTGCTGTTG                           |                                                       | 57       |
| <i>D14S617</i><br>14q32.12                 | TTTTAGGTGGCCACCATCTA<br>CCAGTTTAGGCAACAGAACA                           |                                                       | 57       |
| <i>D14S1006</i><br>14q32.2                 | TTCCACAGGGCAAGCAGTA<br>TTCTGGCAAAACCCAACC                              |                                                       | 57       |
| <i>D14S985</i><br>14q32.2                  | CAGTGTGACCTTAAACAAGTCG<br>CCTGTGGGGTAGATACACGA                         |                                                       | 57       |
| <i>D14S1010</i><br>14q32.33                | AGATTCTGGACTTGCCAAC<br>GTAGTAGTCAGGGCTTCTAGAG                          |                                                       | 57       |
| <i>D14S292</i><br>14q32.33                 | CTGTGTGGTGCATCAATG<br>CATGAAGGCAGCCTCA                                 |                                                       | 57       |

AT: annealing temperature (°C); CN: cycle numbers; Y: C or T (pyrimidine); and R: A or G (purine).

Physical positions of the primers are based on the NCBI database (Genome Build 37.1).

**Table S2** Methylation levels ( $\beta$ -values) of each CpG site in leukocyte DNA samples

| CHR | Examined CpG |            |                   | This patient |               | Controls (n = 11) |           |           |           |
|-----|--------------|------------|-------------------|--------------|---------------|-------------------|-----------|-----------|-----------|
|     | MAPINFO      | ID         | DMR               | Average      | $\Delta\beta$ | Average           | SD        | AVG-3SD   | AVG+3SD   |
| 1   | 40024971     | cg10243676 | PPIEL:Ex-DMR      | 0.6463961    | 0.006116282   | 0.6402798         | 0.0322834 | 0.5434295 | 0.7371302 |
| 1   | 40025232     | cg11704876 | PPIEL:Ex-DMR      | 0.6538633    | -0.016460455  | 0.6703238         | 0.0320186 | 0.574268  | 0.7663795 |
| 1   | 40025411     | cg22862450 | PPIEL:Ex-DMR      | 0.7200186    | -0.004467655  | 0.7244863         | 0.0238927 | 0.6528081 | 0.7961644 |
| 1   | 40025415     | cg15057250 | PPIEL:Ex-DMR      | 0.7351566    | -0.007631127  | 0.7427877         | 0.0279188 | 0.6590312 | 0.8265442 |
| 1   | 68512539     | cg03641225 | DIRAS3:Ex2-DMR    | 0.399576     | 0.020916418   | 0.3786596         | 0.0184732 | 0.3232399 | 0.4340793 |
| 1   | 68512650     | cg24871743 | DIRAS3:Ex2-DMR    | 0.6131586    | -0.007475645  | 0.6206342         | 0.0198708 | 0.5610217 | 0.6802468 |
| 1   | 68512777     | cg22901840 | DIRAS3:Ex2-DMR    | 0.5302078    | 0.006836536   | 0.5233713         | 0.0149824 | 0.4784239 | 0.5683186 |
| 1   | 68512807     | cg20149168 | DIRAS3:Ex2-DMR    | 0.6052529    | 0.009366664   | 0.5958862         | 0.0166689 | 0.5458796 | 0.6458929 |
| 1   | 68512845     | cg13697378 | DIRAS3:Ex2-DMR    | 0.4898882    | -0.006860782  | 0.496749          | 0.0163391 | 0.4477318 | 0.5457662 |
| 1   | 68512928     | cg00448707 | DIRAS3:Ex2-DMR    | 0.6027792    | -0.014185209  | 0.6169644         | 0.019267  | 0.5591633 | 0.6747655 |
| 1   | 68512971     | cg09118625 | DIRAS3:Ex2-DMR    | 0.5430354    | 0.005671136   | 0.5373643         | 0.018538  | 0.4817503 | 0.5929782 |
| 1   | 68513063     | cg21808053 | DIRAS3:Ex2-DMR    | 0.4894189    | 0.015881882   | 0.473537          | 0.0086673 | 0.447535  | 0.4995391 |
| 1   | 68515788     | cg02317907 | DIRAS3:TSS-DMR    | 0.7194357    | 0.017459991   | 0.7019757         | 0.0210726 | 0.6387579 | 0.7651936 |
| 1   | 68515872     | cg17943391 | DIRAS3:TSS-DMR    | 0.4569397    | 0.005282218   | 0.4516575         | 0.0149272 | 0.406876  | 0.496439  |
| 1   | 68515977     | cg19114595 | DIRAS3:TSS-DMR    | 0.601905     | -0.016282027  | 0.618187          | 0.0180048 | 0.5641727 | 0.6722014 |
| 1   | 68516080     | cg12070746 | DIRAS3:TSS-DMR    | 0.502683     | 0.003095627   | 0.4995874         | 0.0098203 | 0.4701264 | 0.5290484 |
| 1   | 68516093     | cg11465163 | DIRAS3:TSS-DMR    | 0.6467228    | -0.001737482  | 0.6484603         | 0.015338  | 0.6024462 | 0.6944744 |
| 1   | 68516101     | cg16314899 | DIRAS3:TSS-DMR    | 0.6350874    | 0.027179473   | 0.6079079         | 0.0128232 | 0.5694383 | 0.6463776 |
| 1   | 68516138     | cg25755905 | DIRAS3:TSS-DMR    | 0.4734966    | -0.010249691  | 0.4837463         | 0.0179231 | 0.4299771 | 0.5375154 |
| 1   | 68516272     | cg22500004 | DIRAS3:TSS-DMR    | 0.5650154    | -0.006290836  | 0.5713062         | 0.016037  | 0.5231953 | 0.6194171 |
| 1   | 68516279     | cg05949203 | DIRAS3:TSS-DMR    | 0.6149407    | 0.006023009   | 0.6089177         | 0.0180083 | 0.5548929 | 0.6629425 |
| 1   | 68516374     | cg19694923 | DIRAS3:TSS-DMR    | 0.4952858    | 0.001358973   | 0.4939268         | 0.0159916 | 0.4459519 | 0.5419017 |
| 1   | 68516453     | cg05392265 | DIRAS3:TSS-DMR    | 0.5254716    | -0.009000264  | 0.5349719         | 0.0182585 | 0.4801965 | 0.5897473 |
| 1   | 68516463     | cg06191076 | DIRAS3:TSS-DMR    | 0.5464724    | -0.003447173  | 0.5499196         | 0.0158382 | 0.5024049 | 0.5974342 |
| 1   | 68516465     | cg16148270 | DIRAS3:TSS-DMR    | 0.6192043    | -0.004502409  | 0.6237067         | 0.019417  | 0.5654556 | 0.6819578 |
| 1   | 68516472     | cg16682227 | DIRAS3:TSS-DMR    | 0.4595132    | -0.000990536  | 0.4605037         | 0.0258981 | 0.3828093 | 0.5381981 |
| 1   | 68516518     | cg13208159 | DIRAS3:TSS-DMR    | 0.5297913    | 0.007261009   | 0.5225303         | 0.0144948 | 0.4790458 | 0.5660148 |
| 1   | 68516627     | cg12986021 | DIRAS3:TSS-DMR    | 0.5574834    | -0.001036691  | 0.5585195         | 0.0190366 | 0.5014097 | 0.6156293 |
| 1   | 68516713     | cg13099417 | DIRAS3:TSS-DMR    | 0.6133906    | -0.005069827  | 0.6184604         | 0.0281873 | 0.5338984 | 0.7030224 |
| 1   | 68517177     | cg27545611 | DIRAS3:TSS-DMR    | 0.4305657    | -0.087716618  | 0.5182823         | 0.0393991 | 0.4000849 | 0.6364797 |
| 1   | 68517205     | cg16148134 | DIRAS3:TSS-DMR    | 0.4180758    | -0.0802015    | 0.4982773         | 0.0517627 | 0.3429893 | 0.6535653 |
| 1   | 68517255     | cg13605615 | DIRAS3:TSS-DMR    | 0.4714401    | -0.044485264  | 0.5159254         | 0.0219505 | 0.450074  | 0.5817768 |
| 1   | 68517273     | cg10038185 | DIRAS3:TSS-DMR    | 0.4670976    | -0.091643773  | 0.5587414         | 0.0445013 | 0.4252374 | 0.6922454 |
| 2   | 207116070    | cg25535070 | ZBDF2/GOR1:IG-DMR | 0.7298689    | 0.001902427   | 0.7279665         | 0.0127206 | 0.6898047 | 0.7661282 |
| 2   | 207116401    | cg04359324 | ZBDF2/GOR1:IG-DMR | 0.6740322    | 0.008387927   | 0.6656443         | 0.0232097 | 0.5960152 | 0.7352733 |
| 2   | 207118253    | cg20471298 | ZBDF2/GOR1:IG-DMR | 0.6440738    | -0.012121945  | 0.6561957         | 0.0163515 | 0.6071413 | 0.7052502 |
| 2   | 207118288    | cg03428109 | ZBDF2/GOR1:IG-DMR | 0.6876256    | -0.022364318  | 0.7099899         | 0.0154859 | 0.6635322 | 0.7564476 |
| 2   | 207127226    | cg25307915 | ZBDF2/GOR1:IG-DMR | 0.6291717    | 0.003596127   | 0.6255756         | 0.0195859 | 0.5668179 | 0.6843332 |
| 2   | 207127364    | cg19366042 | ZBDF2/GOR1:IG-DMR | 0.6858247    | 0.033625955   | 0.6521987         | 0.0265153 | 0.5726528 | 0.7317447 |
| 2   | 207129158    | cg09448460 | ZBDF2/GOR1:IG-DMR | 0.4254104    | 0.008982209   | 0.4164282         | 0.0196893 | 0.3573601 | 0.4754962 |
| 2   | 207136184    | cg10583266 | ZBDF2/GOR1:IG-DMR | 0.5843978    | 0.027819618   | 0.5565782         | 0.039473  | 0.4381592 | 0.6749972 |
| 4   | 89618324     | cg18772071 | NAP1L5:TSS-DMR    | 0.5215518    | 0.028153636   | 0.4933982         | 0.0225162 | 0.4258496 | 0.5609468 |
| 4   | 89618411     | cg17635114 | NAP1L5:TSS-DMR    | 0.5146519    | 0.011201391   | 0.5034505         | 0.0144323 | 0.4601536 | 0.5467475 |
| 4   | 89618533     | cg05065100 | NAP1L5:TSS-DMR    | 0.5841799    | 0.022974682   | 0.5612052         | 0.0180719 | 0.5069896 | 0.6154208 |
| 4   | 89618637     | cg12759554 | NAP1L5:TSS-DMR    | 0.5186663    | 0.024248055   | 0.4944182         | 0.0140441 | 0.4522858 | 0.5365506 |
| 4   | 89618667     | cg01578057 | NAP1L5:TSS-DMR    | 0.5045544    | 0.022012527   | 0.4825419         | 0.0145555 | 0.4388753 | 0.5622085 |
| 4   | 89618861     | cg27150681 | NAP1L5:TSS-DMR    | 0.6689119    | -0.002722255  | 0.6716342         | 0.0202628 | 0.6108456 | 0.7324227 |
| 4   | 89618982     | cg23954636 | NAP1L5:TSS-DMR    | 0.5508028    | -0.004103664  | 0.5549065         | 0.0175586 | 0.5022308 | 0.6075821 |
| 4   | 89619014     | cg01174175 | NAP1L5:TSS-DMR    | 0.6112384    | 0.001863336   | 0.6093751         | 0.0151444 | 0.5639419 | 0.6548082 |
| 4   | 89619023     | cg06617468 | NAP1L5:TSS-DMR    | 0.6140429    | -0.003881982  | 0.6143249         | 0.0169174 | 0.5635726 | 0.6650772 |
| 4   | 89619030     | cg18607468 | NAP1L5:TSS-DMR    | 0.634524     | -0.017055009  | 0.651579          | 0.0172589 | 0.5998024 | 0.7033557 |
| 4   | 89619038     | cg11300971 | NAP1L5:TSS-DMR    | 0.7065017    | 0.011754036   | 0.6947477         | 0.0238906 | 0.6230759 | 0.7664195 |
| 4   | 89619051     | cg19151808 | NAP1L5:TSS-DMR    | 0.6410284    | 0.018680191   | 0.6223482         | 0.024458  | 0.5489741 | 0.6957223 |
| 4   | 89619085     | cg13610072 | NAP1L5:TSS-DMR    | 0.6457302    | -0.001787618  | 0.6475178         | 0.0201152 | 0.5871721 | 0.7078635 |
| 4   | 89619236     | cg07539802 | NAP1L5:TSS-DMR    | 0.733314     | 0.019273773   | 0.7140402         | 0.0164729 | 0.6646217 | 0.7634588 |
| 6   | 3849095      | cg18872973 | FAM50B:TSS-DMR    | 0.7331886    | 0.001748018   | 0.7314406         | 0.0241902 | 0.6588698 | 0.8040113 |
| 6   | 3849190      | cg17739279 | FAM50B:TSS-DMR    | 0.6515269    | 0.019210136   | 0.6323168         | 0.0247401 | 0.5580966 | 0.706537  |
| 6   | 3849235      | cg18656763 | FAM50B:TSS-DMR    | 0.4722761    | -0.0015432    | 0.4738193         | 0.0183307 | 0.4188273 | 0.5288113 |
| 6   | 3849272      | cg01570885 | FAM50B:TSS-DMR    | 0.5515888    | 0.020410673   | 0.5311781         | 0.0215897 | 0.466409  | 0.5959473 |
| 6   | 3849277      | cg09821214 | FAM50B:TSS-DMR    | 0.5447869    | 0.015157227   | 0.5296297         | 0.017342  | 0.4776036 | 0.5816557 |
| 6   | 3849294      | cg07898446 | FAM50B:TSS-DMR    | 0.5016198    | 0.017822264   | 0.4837975         | 0.0278707 | 0.4001853 | 0.5674097 |
| 6   | 3849327      | cg25195497 | FAM50B:TSS-DMR    | 0.5677111    | -0.016113891  | 0.583825          | 0.0176713 | 0.5308111 | 0.6368389 |
| 6   | 3849331      | cg21740964 | FAM50B:TSS-DMR    | 0.5533577    | -0.007766745  | 0.5611244         | 0.0116223 | 0.5112555 | 0.6109934 |
| 6   | 3849350      | cg13289019 | FAM50B:TSS-DMR    | 0.4442793    | 0.010209345   | 0.43407           | 0.0250694 | 0.3588618 | 0.5092781 |
| 6   | 3849381      | cg12840312 | FAM50B:TSS-DMR    | 0.5604189    | 0.028732191   | 0.5316867         | 0.0242008 | 0.4590844 | 0.604289  |
| 6   | 3849391      | cg01905633 | FAM50B:TSS-DMR    | 0.5043511    | 0.021524218   | 0.4828269         | 0.023466  | 0.4124288 | 0.553225  |
| 6   | 3849411      | cg21177626 | FAM50B:TSS-DMR    | 0.446828     | 0.016098445   | 0.4307296         | 0.0257127 | 0.3535915 | 0.5078676 |
| 6   | 3849434      | cg03954573 | FAM50B:TSS-DMR    | 0.6231949    | 0.028108291   | 0.5950866         | 0.0188151 | 0.5386412 | 0.651532  |
| 6   | 3849442      | cg19362611 | FAM50B:TSS-DMR    | 0.6312589    | 0.031592809   | 0.5996661         | 0.0173134 | 0.547726  | 0.6516062 |
| 6   | 3849458      | cg18197332 | FAM50B:TSS-DMR    | 0.6070232    | 0.034779355   | 0.5722438         | 0.0229757 | 0.5033167 | 0.641171  |
| 6   | 3849475      | cg04447621 | FAM50B:TSS-DMR    | 0.585716     | 0.034315727   | 0.5514003         | 0.0284077 | 0.4661772 | 0.6366233 |
| 6   | 3849536      | cg23835083 | FAM50B:TSS-DMR    | 0.6008574    | 0.026327436   | 0.57453           | 0.01909   | 0.51726   | 0.6317999 |
| 6   | 3849542      | cg18487516 | FAM50B:TSS-DMR    | 0.610714     | 0.016491009   | 0.594223          | 0.0247351 | 0.5200178 | 0.6684282 |
| 6   | 3849577      | cg12497786 | FAM50B:TSS-DMR    | 0.6233073    | -0.004123645  | 0.6274309         | 0.0315699 | 0.5327214 | 0.7221405 |

|   |           |            |                    |           |              |           |           |           |           |
|---|-----------|------------|--------------------|-----------|--------------|-----------|-----------|-----------|-----------|
| 6 | 3849688   | cg03202897 | FAM50B:TSS-DMR     | 0.5598683 | 0.010932     | 0.5489363 | 0.0175936 | 0.4961556 | 0.601717  |
| 6 | 3849690   | cg21153160 | FAM50B:TSS-DMR     | 0.4895838 | -0.007121773 | 0.4967056 | 0.0220267 | 0.4306255 | 0.5627856 |
| 6 | 3849702   | cg25073793 | FAM50B:TSS-DMR     | 0.5393915 | 0.020011127  | 0.5193804 | 0.0191745 | 0.4618569 | 0.5769038 |
| 6 | 3849801   | cg27445347 | FAM50B:TSS-DMR     | 0.5662047 | 0.008774973  | 0.5574297 | 0.0170852 | 0.5061741 | 0.6086854 |
| 6 | 3849818   | cg13101072 | FAM50B:TSS-DMR     | 0.559194  | 0.011788409  | 0.5474056 | 0.020275  | 0.4865806 | 0.6082306 |
| 6 | 3850106   | cg05811173 | FAM50B:TSS-DMR     | 0.5549968 | -0.000258991 | 0.5552558 | 0.0194478 | 0.4969125 | 0.6135991 |
| 6 | 144328421 | cg09730369 | PLAGL1:alt-TSS-DMR | 0.7394822 | 0.003907718  | 0.7355745 | 0.0148647 | 0.6909803 | 0.7801686 |
| 6 | 144328482 | cg17865602 | PLAGL1:alt-TSS-DMR | 0.6352171 | 0.016076964  | 0.6191401 | 0.0136796 | 0.5781014 | 0.6601789 |
| 6 | 144328917 | cg25350411 | PLAGL1:alt-TSS-DMR | 0.5661373 | 0.032374     | 0.5337633 | 0.0122595 | 0.4969849 | 0.5705417 |
| 6 | 144329052 | cg07077459 | PLAGL1:alt-TSS-DMR | 0.6186677 | 0.031083391  | 0.5875843 | 0.01996   | 0.5277043 | 0.6474643 |
| 6 | 144329172 | cg22378065 | PLAGL1:alt-TSS-DMR | 0.5941941 | 0.016251518  | 0.5779426 | 0.01273   | 0.5397525 | 0.6161326 |
| 6 | 144329331 | cg10007452 | PLAGL1:alt-TSS-DMR | 0.5086828 | 0.001184255  | 0.5074985 | 0.0135831 | 0.4667491 | 0.548248  |
| 6 | 144329382 | cg22352234 | PLAGL1:alt-TSS-DMR | 0.593805  | 0.0128584    | 0.5809466 | 0.0142237 | 0.5382754 | 0.6236178 |
| 6 | 144329473 | cg00702231 | PLAGL1:alt-TSS-DMR | 0.6592978 | 0.029718673  | 0.6295791 | 0.0161537 | 0.5811179 | 0.6780404 |
| 6 | 144329485 | cg12757684 | PLAGL1:alt-TSS-DMR | 0.5235893 | 0.014840791  | 0.5087485 | 0.0190286 | 0.4516628 | 0.5658342 |
| 6 | 144329672 | cg21526238 | PLAGL1:alt-TSS-DMR | 0.6077184 | 0.026454809  | 0.5812636 | 0.0193141 | 0.5233213 | 0.6392058 |
| 6 | 144329732 | cg21952820 | PLAGL1:alt-TSS-DMR | 0.5422608 | -0.037688564 | 0.5799494 | 0.0611266 | 0.3965694 | 0.7633293 |
| 6 | 144329766 | cg05326984 | PLAGL1:alt-TSS-DMR | 0.5669835 | 0.021838536  | 0.545145  | 0.0250407 | 0.4700228 | 0.6202671 |
| 6 | 144329780 | cg08263357 | PLAGL1:alt-TSS-DMR | 0.6107276 | 0.0115437    | 0.5952906 | 0.0188196 | 0.5388318 | 0.6517494 |
| 6 | 144329789 | cg11532302 | PLAGL1:alt-TSS-DMR | 0.5710708 | 0.010836418  | 0.5602344 | 0.0274667 | 0.4778344 | 0.6426344 |
| 6 | 144329802 | cg27216384 | PLAGL1:alt-TSS-DMR | 0.5213553 | 0.021509382  | 0.4998459 | 0.0169639 | 0.4489542 | 0.5507376 |
| 6 | 144329829 | cg17895149 | PLAGL1:alt-TSS-DMR | 0.5910562 | 0.038119991  | 0.5529362 | 0.0134084 | 0.5127111 | 0.5931613 |
| 6 | 144329887 | cg23460430 | PLAGL1:alt-TSS-DMR | 0.563308  | -0.055400018 | 0.618708  | 0.0191324 | 0.5631107 | 0.6761053 |
| 6 | 160426951 | cg12625139 | IGF2R:Int2-DMR     | 0.6959423 | 0.002097764  | 0.6938445 | 0.0341083 | 0.5915196 | 0.7961694 |
| 6 | 160427501 | cg08350488 | IGF2R:Int2-DMR     | 0.614598  | 0.038939227  | 0.5756588 | 0.0737334 | 0.3544586 | 0.7968589 |
| 6 | 170054730 | cg19089141 | WDR27:Int13-DMR    | 0.6130894 | -0.100435045 | 0.7135244 | 0.202382  | 0.1063783 | 1.3206706 |
| 6 | 170055155 | cg11938672 | WDR27:Int13-DMR    | 0.642094  | -0.0065075   | 0.6486015 | 0.0263765 | 0.5694719 | 0.7277311 |
| 6 | 170055332 | cg18322025 | WDR27:Int13-DMR    | 0.5442767 | -0.009850864 | 0.5541276 | 0.0310518 | 0.4609723 | 0.6472828 |
| 7 | 50849168  | cg03104936 | GRB10:alt-TSS-DMR  | 0.6359077 | 0.055909527  | 0.5799982 | 0.0313844 | 0.4858449 | 0.6741515 |
| 7 | 50849285  | cg05998930 | GRB10:alt-TSS-DMR  | 0.7318674 | 0.046952482  | 0.6849149 | 0.0304367 | 0.5936049 | 0.7762249 |
| 7 | 50849415  | cg25915982 | GRB10:alt-TSS-DMR  | 0.7149341 | 0.0148345    | 0.7000996 | 0.0312981 | 0.6062053 | 0.7939939 |
| 7 | 50849639  | cg09105232 | GRB10:alt-TSS-DMR  | 0.7885777 | 0.021154309  | 0.7673795 | 0.0215411 | 0.7027561 | 0.8320028 |
| 7 | 50849723  | cg16349612 | GRB10:alt-TSS-DMR  | 0.6465362 | 0.010505164  | 0.636031  | 0.0213977 | 0.571838  | 0.700224  |
| 7 | 50849805  | cg23742152 | GRB10:alt-TSS-DMR  | 0.5468902 | 0.007146173  | 0.539744  | 0.0312525 | 0.4459864 | 0.6335016 |
| 7 | 50849931  | cg08835688 | GRB10:alt-TSS-DMR  | 0.5756932 | 0.035072109  | 0.5406211 | 0.0153459 | 0.4945835 | 0.5866587 |
| 7 | 50850564  | cg12903171 | GRB10:alt-TSS-DMR  | 0.5062315 | 0.027996155  | 0.4782353 | 0.0145879 | 0.4344717 | 0.521999  |
| 7 | 50850870  | cg24977055 | GRB10:alt-TSS-DMR  | 0.5591252 | 0.017042164  | 0.542083  | 0.0147746 | 0.4977593 | 0.5864067 |
| 7 | 94285642  | cg19107595 | PEG10:TSS-DMR      | 0.362795  | 0.034567927  | 0.3282271 | 0.0115291 | 0.2936397 | 0.3628145 |
| 7 | 94285672  | cg19924104 | PEG10:TSS-DMR      | 0.4427561 | 0.007551627  | 0.4352045 | 0.0207429 | 0.3729758 | 0.4974331 |
| 7 | 94285685  | cg11589966 | PEG10:TSS-DMR      | 0.5267744 | 0.009578164  | 0.5171962 | 0.0133658 | 0.477099  | 0.5572935 |
| 7 | 94285712  | cg27435646 | PEG10:TSS-DMR      | 0.5453156 | -0.005633409 | 0.550949  | 0.0135991 | 0.5101516 | 0.5917464 |
| 7 | 94285745  | cg01566785 | PEG10:TSS-DMR      | 0.5284543 | 0.007642209  | 0.5208121 | 0.019414  | 0.4625701 | 0.579054  |
| 7 | 94285759  | cg05819130 | PEG10:TSS-DMR      | 0.5856032 | 0.003073618  | 0.5825296 | 0.0194487 | 0.5241835 | 0.6408756 |
| 7 | 94285768  | cg10105290 | PEG10:TSS-DMR      | 0.5737557 | 0.0012716    | 0.5724841 | 0.0178663 | 0.5188853 | 0.6260829 |
| 7 | 94285777  | cg19079047 | PEG10:TSS-DMR      | 0.4552785 | 0.012569218  | 0.4427093 | 0.0147354 | 0.398503  | 0.4869155 |
| 7 | 94285784  | cg02965180 | PEG10:TSS-DMR      | 0.5865396 | 0.0197351    | 0.5668045 | 0.016331  | 0.5178116 | 0.6157974 |
| 7 | 94285814  | cg05277165 | PEG10:TSS-DMR      | 0.5201546 | 0.009449236  | 0.5107054 | 0.0157966 | 0.4633155 | 0.5580952 |
| 7 | 94285873  | cg13660372 | PEG10:TSS-DMR      | 0.4961601 | 0.011283855  | 0.4848762 | 0.0123159 | 0.4479286 | 0.5218239 |
| 7 | 94285887  | cg06674062 | PEG10:TSS-DMR      | 0.5028126 | 0.025077809  | 0.4777348 | 0.0137574 | 0.4364626 | 0.5190069 |
| 7 | 94285902  | cg21778340 | PEG10:TSS-DMR      | 0.5554951 | 0.030653991  | 0.5248411 | 0.02228   | 0.458001  | 0.5916812 |
| 7 | 94285911  | cg07921535 | PEG10:TSS-DMR      | 0.3923048 | 0.054664555  | 0.3376402 | 0.0290711 | 0.2504269 | 0.4248536 |
| 7 | 94285942  | cg09910998 | PEG10:TSS-DMR      | 0.5405343 | 0.016825582  | 0.5237087 | 0.0161775 | 0.4751763 | 0.5722411 |
| 7 | 94285951  | cg27393730 | PEG10:TSS-DMR      | 0.5761732 | 0.014384691  | 0.5617885 | 0.0188477 | 0.5052455 | 0.6183315 |
| 7 | 94285960  | cg08291000 | PEG10:TSS-DMR      | 0.5474182 | 0.021307036  | 0.5261112 | 0.0099197 | 0.496352  | 0.5558703 |
| 7 | 94285993  | cg27230044 | PEG10:TSS-DMR      | 0.5488794 | 0.026170245  | 0.5227092 | 0.0153118 | 0.4767738 | 0.5686445 |
| 7 | 94286086  | cg24885794 | PEG10:TSS-DMR      | 0.5162455 | 0.032484609  | 0.4837609 | 0.0104932 | 0.4522813 | 0.5152405 |
| 7 | 94286110  | cg26997085 | PEG10:TSS-DMR      | 0.5397088 | 0.035631382  | 0.5040774 | 0.01532   | 0.4581175 | 0.5500373 |
| 7 | 94286131  | cg22331138 | PEG10:TSS-DMR      | 0.6262677 | 0.011954582  | 0.6143131 | 0.0213579 | 0.5502395 | 0.6783867 |
| 7 | 94286208  | cg16492735 | PEG10:TSS-DMR      | 0.6218741 | 0.0185719    | 0.6033022 | 0.0139623 | 0.5614154 | 0.645189  |
| 7 | 94286219  | cg09512080 | PEG10:TSS-DMR      | 0.5922224 | 0.019815518  | 0.5724069 | 0.0121279 | 0.5360231 | 0.6087906 |
| 7 | 94286232  | cg00906934 | PEG10:TSS-DMR      | 0.5680797 | 0.025427209  | 0.5426525 | 0.0125315 | 0.505058  | 0.5802469 |
| 7 | 94286243  | cg26503018 | PEG10:TSS-DMR      | 0.5958731 | 0.016595709  | 0.5792774 | 0.0100008 | 0.4592749 | 0.6092799 |
| 7 | 94286261  | cg27120649 | PEG10:TSS-DMR      | 0.4402453 | 0.0169546    | 0.4232907 | 0.0197382 | 0.3640762 | 0.4825052 |
| 7 | 94286263  | cg21771834 | PEG10:TSS-DMR      | 0.5904964 | 0.019434491  | 0.5710619 | 0.0102195 | 0.5404035 | 0.6017203 |
| 7 | 94286267  | cg27001184 | PEG10:TSS-DMR      | 0.6186727 | 0.007635655  | 0.611037  | 0.0113595 | 0.5769586 | 0.6451155 |
| 7 | 94286294  | cg23342787 | PEG10:TSS-DMR      | 0.6163947 | -0.000718227 | 0.6171129 | 0.0108863 | 0.5844541 | 0.6497717 |
| 7 | 94286304  | cg14873490 | PEG10:TSS-DMR      | 0.531641  | 0.017850827  | 0.5137902 | 0.0192457 | 0.4560531 | 0.5715273 |
| 7 | 94286343  | cg03384175 | PEG10:TSS-DMR      | 0.6172147 | 0.024650773  | 0.5925639 | 0.0152511 | 0.5468107 | 0.6383171 |
| 7 | 94286351  | cg11985632 | PEG10:TSS-DMR      | 0.6347302 | 0.021760682  | 0.6129695 | 0.0157911 | 0.5655963 | 0.6603428 |
| 7 | 94286362  | cg13797824 | PEG10:TSS-DMR      | 0.6033916 | 0.013466991  | 0.5899246 | 0.0119479 | 0.554081  | 0.6257682 |
| 7 | 94286420  | cg11175683 | PEG10:TSS-DMR      | 0.6110287 | 0.021448327  | 0.5895804 | 0.0115925 | 0.5548029 | 0.6243578 |
| 7 | 94286431  | cg04521244 | PEG10:TSS-DMR      | 0.6070902 | 0.015907064  | 0.5911831 | 0.010265  | 0.5603882 | 0.621978  |
| 7 | 94286473  | cg11562309 | PEG10:TSS-DMR      | 0.5803903 | 0.019921727  | 0.5604686 | 0.0129854 | 0.5215125 | 0.5994246 |
| 7 | 94286484  | cg18898992 | PEG10:TSS-DMR      | 0.605432  | 0.017242891  | 0.5881891 | 0.0136744 | 0.5471659 | 0.6292124 |
| 7 | 94286511  | cg05096321 | PEG10:TSS-DMR      | 0.5509483 | 0.015423518  | 0.5355248 | 0.0165995 | 0.4857264 | 0.5853232 |
| 7 | 94286521  | cg19663555 | PEG10:TSS-DMR      | 0.5958363 | 0.014827864  | 0.5810084 | 0.010011  | 0.5509754 | 0.6110414 |
| 7 | 94286526  | cg06695761 | PEG10:TSS-DMR      | 0.5831138 | 0.010715627  | 0.5723982 | 0.0073011 | 0.5504948 | 0.5943015 |
| 7 | 94286559  | cg21853542 | PEG10:TSS-DMR      | 0.6235989 | 0.013820064  | 0.6097788 | 0.0119525 | 0.5739213 | 0.6456363 |
| 7 | 94286632  | cg04634483 | PEG10:TSS-DMR      | 0.5775709 | 0.018803291  | 0.5587676 | 0.009282  | 0.5309217 | 0.5866135 |

|   |           |            |                  |           |              |           |           |           |           |
|---|-----------|------------|------------------|-----------|--------------|-----------|-----------|-----------|-----------|
| 7 | 94286650  | cg09890341 | PEG10:TSS-DMR    | 0.5942821 | 0.014688827  | 0.5795933 | 0.0170116 | 0.5285585 | 0.630628  |
| 7 | 94286669  | cg20041873 | PEG10:TSS-DMR    | 0.5839181 | 0.002074964  | 0.5818431 | 0.017025  | 0.5307682 | 0.632918  |
| 7 | 94286753  | cg04303139 | PEG10:TSS-DMR    | 0.5285588 | 0.013869873  | 0.5146889 | 0.0098871 | 0.4850275 | 0.5443503 |
| 7 | 94286760  | cg03436478 | PEG10:TSS-DMR    | 0.5881773 | 0.026444282  | 0.561733  | 0.0133692 | 0.5216254 | 0.6018407 |
| 7 | 94286793  | cg05509218 | PEG10:TSS-DMR    | 0.6261457 | 0.024235209  | 0.6019105 | 0.0148701 | 0.5573003 | 0.6465206 |
| 7 | 94286834  | cg22924867 | PEG10:TSS-DMR    | 0.5943012 | 0.042579055  | 0.5517221 | 0.0172835 | 0.4998715 | 0.6035728 |
| 7 | 94286936  | cg01169624 | PEG10:TSS-DMR    | 0.6458765 | 0.024676027  | 0.6212005 | 0.0200812 | 0.5609569 | 0.6814441 |
| 7 | 94286953  | cg03682823 | PEG10:TSS-DMR    | 0.5603937 | 0.005729373  | 0.5546643 | 0.0140212 | 0.5126008 | 0.5967279 |
| 7 | 94286955  | cg18139769 | PEG10:TSS-DMR    | 0.5635884 | 0.011592418  | 0.551996  | 0.0143464 | 0.5089568 | 0.5950352 |
| 7 | 94287186  | cg12397924 | PEG10:TSS-DMR    | 0.4133907 | -0.016873636 | 0.4302643 | 0.0210058 | 0.367247  | 0.4932816 |
| 7 | 94287211  | cg15696408 | PEG10:TSS-DMR    | 0.305298  | -0.003061755 | 0.3083598 | 0.0216392 | 0.2434422 | 0.3732774 |
| 7 | 94287242  | cg22820921 | PEG10:TSS-DMR    | 0.4344575 | 0.010509373  | 0.4239481 | 0.0197657 | 0.3646509 | 0.4832454 |
| 7 | 130130122 | cg10473158 | MEST:alt-TSS-DMR | 0.57685   | -0.132045855 | 0.7088959 | 0.0410835 | 0.5856455 | 0.8321462 |
| 7 | 130130155 | cg05222671 | MEST:alt-TSS-DMR | 0.6367831 | -0.119301073 | 0.7560842 | 0.0272988 | 0.6741876 | 0.8379807 |
| 7 | 130130187 | cg10767216 | MEST:alt-TSS-DMR | 0.5510967 | -0.108760918 | 0.6598576 | 0.0341909 | 0.5572849 | 0.7624303 |
| 7 | 130130189 | cg12070022 | MEST:alt-TSS-DMR | 0.5161672 | -0.109379682 | 0.6255469 | 0.0383191 | 0.5105895 | 0.7405043 |
| 7 | 130130203 | cg15068552 | MEST:alt-TSS-DMR | 0.6595053 | -0.111967727 | 0.771473  | 0.0370496 | 0.6603243 | 0.8826218 |
| 7 | 130130288 | cg17347253 | MEST:alt-TSS-DMR | 0.536502  | -0.095206027 | 0.631708  | 0.0304954 | 0.5402218 | 0.7231942 |
| 7 | 130130320 | cg02756856 | MEST:alt-TSS-DMR | 0.6324094 | -0.017527873 | 0.7119373 | 0.0274938 | 0.6294557 | 0.7944188 |
| 7 | 130130383 | cg26275543 | MEST:alt-TSS-DMR | 0.5091245 | -0.085928818 | 0.5950533 | 0.0171159 | 0.5437057 | 0.6464009 |
| 7 | 130130478 | cg20826277 | MEST:alt-TSS-DMR | 0.5034333 | -0.057544691 | 0.560978  | 0.0176395 | 0.5080594 | 0.6138966 |
| 7 | 130130481 | cg14584935 | MEST:alt-TSS-DMR | 0.4930146 | -0.061821182 | 0.5548358 | 0.0183137 | 0.4998947 | 0.6097769 |
| 7 | 130130588 | cg24941047 | MEST:alt-TSS-DMR | 0.7534193 | -0.012524627 | 0.7659439 | 0.0137109 | 0.7248112 | 0.8070767 |
| 7 | 130130596 | cg07427065 | MEST:alt-TSS-DMR | 0.5347213 | 0.006235064  | 0.5284862 | 0.0082663 | 0.5036874 | 0.553285  |
| 7 | 130130740 | cg02501418 | MEST:alt-TSS-DMR | 0.6446663 | 0.026542391  | 0.6181239 | 0.0121184 | 0.5817686 | 0.6544792 |
| 7 | 130130747 | cg08229366 | MEST:alt-TSS-DMR | 0.6269354 | -0.000248273 | 0.6271837 | 0.0198666 | 0.5675839 | 0.6867834 |
| 7 | 130130918 | cg27417677 | MEST:alt-TSS-DMR | 0.6287177 | 0.0208814    | 0.6078363 | 0.0139298 | 0.5660468 | 0.6496258 |
| 7 | 130130995 | cg09003373 | MEST:alt-TSS-DMR | 0.4849824 | 0.025045673  | 0.4599367 | 0.015875  | 0.4123117 | 0.5075617 |
| 7 | 130131085 | cg14088957 | MEST:alt-TSS-DMR | 0.4858701 | 0.022291755  | 0.4635783 | 0.0123432 | 0.4265487 | 0.500608  |
| 7 | 130131136 | cg06100421 | MEST:alt-TSS-DMR | 0.5294976 | 0.013146491  | 0.5163511 | 0.0175034 | 0.463841  | 0.5688612 |
| 7 | 130131138 | cg20297423 | MEST:alt-TSS-DMR | 0.5251802 | 0.020998355  | 0.5041818 | 0.0197136 | 0.445041  | 0.5633227 |
| 7 | 130131146 | cg05369791 | MEST:alt-TSS-DMR | 0.4971389 | 0.011456345  | 0.4856826 | 0.0187621 | 0.4293963 | 0.5419688 |
| 7 | 130131189 | cg08734637 | MEST:alt-TSS-DMR | 0.5222807 | 0.006368009  | 0.5159127 | 0.0158605 | 0.4683312 | 0.5634942 |
| 7 | 130131258 | cg13917504 | MEST:alt-TSS-DMR | 0.5657064 | -0.001927864 | 0.5676343 | 0.0106654 | 0.535638  | 0.5996305 |
| 7 | 130131268 | cg25407198 | MEST:alt-TSS-DMR | 0.5894413 | 0.011248191  | 0.5781931 | 0.0145336 | 0.5345922 | 0.621794  |
| 7 | 130131359 | cg21667116 | MEST:alt-TSS-DMR | 0.5385171 | 0.023487845  | 0.5150293 | 0.0162557 | 0.4662622 | 0.5637963 |
| 7 | 130131367 | cg23156962 | MEST:alt-TSS-DMR | 0.5016174 | 0.029781745  | 0.4718357 | 0.0116016 | 0.4370309 | 0.5066404 |
| 7 | 130131480 | cg17079325 | MEST:alt-TSS-DMR | 0.6118093 | -0.003597818 | 0.6154071 | 0.0146292 | 0.5715196 | 0.6592946 |
| 7 | 130131484 | cg04344875 | MEST:alt-TSS-DMR | 0.64876   | -1.64364E-05 | 0.6487764 | 0.0111322 | 0.6153798 | 0.682173  |
| 7 | 130131566 | cg18934293 | MEST:alt-TSS-DMR | 0.5979592 | 0.567391     | 0.0242482 | 0.0244643 | 0.6401357 | 0.6401357 |
| 7 | 130131633 | cg00286878 | MEST:alt-TSS-DMR | 0.6119355 | -0.020664964 | 0.6326005 | 0.0150305 | 0.587509  | 0.677692  |
| 7 | 130131676 | cg12347392 | MEST:alt-TSS-DMR | 0.6101874 | 0.044284509  | 0.5659029 | 0.0210643 | 0.5027101 | 0.6290957 |
| 7 | 130131691 | cg04786207 | MEST:alt-TSS-DMR | 0.6567308 | 0.047606827  | 0.609124  | 0.0178044 | 0.5557108 | 0.6625371 |
| 7 | 130131709 | cg19386484 | MEST:alt-TSS-DMR | 0.5648971 | 0.0208354    | 0.5440617 | 0.031653  | 0.4491028 | 0.6390206 |
| 7 | 130131730 | cg26708559 | MEST:alt-TSS-DMR | 0.5829789 | 0.009759782  | 0.5732191 | 0.0147574 | 0.528947  | 0.6174912 |
| 7 | 130131797 | cg22705386 | MEST:alt-TSS-DMR | 0.6404876 | 0.025301391  | 0.6151862 | 0.0137414 | 0.573962  | 0.6564104 |
| 7 | 130131826 | cg06212135 | MEST:alt-TSS-DMR | 0.6721561 | 0.042473727  | 0.6296824 | 0.0207071 | 0.5675612 | 0.6918035 |
| 7 | 130131829 | cg10249538 | MEST:alt-TSS-DMR | 0.6657158 | 0.032621118  | 0.6330947 | 0.0212147 | 0.5694505 | 0.6967389 |
| 7 | 130131869 | cg16823958 | MEST:alt-TSS-DMR | 0.6606497 | 0.016136455  | 0.6445132 | 0.0176157 | 0.5916662 | 0.6973603 |
| 7 | 130131885 | cg27338480 | MEST:alt-TSS-DMR | 0.632674  | 0.020674764  | 0.6119992 | 0.0141016 | 0.5696943 | 0.6543042 |
| 7 | 130131887 | cg09080913 | MEST:alt-TSS-DMR | 0.6846409 | 0.023279655  | 0.6613612 | 0.0146227 | 0.6174931 | 0.7052294 |
| 7 | 130131905 | cg13104298 | MEST:alt-TSS-DMR | 0.6703508 | 0.020402736  | 0.6499481 | 0.0149722 | 0.6050314 | 0.6948647 |
| 7 | 130131916 | cg07315018 | MEST:alt-TSS-DMR | 0.5933333 | 0.015946009  | 0.5773873 | 0.0165022 | 0.5278807 | 0.6268939 |
| 7 | 130131921 | cg21629528 | MEST:alt-TSS-DMR | 0.4932344 | 0.017770391  | 0.475464  | 0.0187457 | 0.4192268 | 0.5317012 |
| 7 | 130131923 | cg20050761 | MEST:alt-TSS-DMR | 0.5382927 | 0.0135576    | 0.5247351 | 0.0146206 | 0.4808732 | 0.568597  |
| 7 | 130131931 | cg07870293 | MEST:alt-TSS-DMR | 0.5625581 | 0.011995236  | 0.5505629 | 0.0171908 | 0.4989904 | 0.6021353 |
| 7 | 130132161 | cg05556276 | MEST:alt-TSS-DMR | 0.5841059 | 0.0091873    | 0.5749186 | 0.0149471 | 0.5300772 | 0.61976   |
| 7 | 130132199 | cg17580798 | MEST:alt-TSS-DMR | 0.607981  | 0.015612382  | 0.5923686 | 0.0228998 | 0.5236692 | 0.661068  |
| 7 | 130132259 | cg05862114 | MEST:alt-TSS-DMR | 0.6050782 | 0.026165827  | 0.5789124 | 0.0222383 | 0.5121976 | 0.6456271 |
| 7 | 130132265 | cg01784351 | MEST:alt-TSS-DMR | 0.555298  | 0.025725255  | 0.5295727 | 0.0172033 | 0.4779629 | 0.5811826 |
| 7 | 130132286 | cg27589003 | MEST:alt-TSS-DMR | 0.4931106 | 0.030997936  | 0.4621127 | 0.014417  | 0.4188618 | 0.5053636 |
| 7 | 130132298 | cg19344806 | MEST:alt-TSS-DMR | 0.6147044 | 0.015102764  | 0.5996016 | 0.015877  | 0.5519705 | 0.6472328 |
| 7 | 130132305 | cg23714917 | MEST:alt-TSS-DMR | 0.6496372 | 0.008643564  | 0.6409936 | 0.0141451 | 0.5985583 | 0.6834289 |
| 7 | 130132319 | cg21200654 | MEST:alt-TSS-DMR | 0.6653253 | 0.0139422    | 0.6513831 | 0.0113393 | 0.6173651 | 0.6854011 |
| 7 | 130132360 | cg25519926 | MEST:alt-TSS-DMR | 0.6306797 | 0.010234691  | 0.620445  | 0.0096305 | 0.5915535 | 0.6493365 |
| 7 | 130132413 | cg09462536 | MEST:alt-TSS-DMR | 0.4503479 | 0.036428264  | 0.4139196 | 0.0128476 | 0.3753769 | 0.4524624 |
| 7 | 130132419 | cg22592140 | MEST:alt-TSS-DMR | 0.5406736 | 0.034157773  | 0.5065158 | 0.0127899 | 0.4681461 | 0.5448855 |
| 7 | 130132422 | cg03588221 | MEST:alt-TSS-DMR | 0.6209381 | 0.004820273  | 0.6161178 | 0.0076756 | 0.5930909 | 0.6391447 |
| 7 | 130132453 | cg13986840 | MEST:alt-TSS-DMR | 0.632702  | 0.0447466    | 0.5879554 | 0.018983  | 0.5310063 | 0.6449045 |
| 7 | 130132727 | cg23312013 | MEST:alt-TSS-DMR | 0.5799993 | 0.015896564  | 0.5641027 | 0.0101632 | 0.5336132 | 0.5945922 |
| 7 | 130132790 | cg14952237 | MEST:alt-TSS-DMR | 0.7157246 | 0.003903109  | 0.7118215 | 0.0138401 | 0.6703012 | 0.7533417 |
| 7 | 130133110 | cg05260959 | MEST:alt-TSS-DMR | 0.6494975 | 0.001725664  | 0.6477718 | 0.0135449 | 0.6071372 | 0.6884064 |
| 7 | 154862770 | cg25780543 | HTR5A:TSS-DMR    | 0.3234864 | -0.018667082 | 0.3421535 | 0.0143485 | 0.2991081 | 0.3851989 |
| 7 | 154862969 | cg00852398 | HTR5A:TSS-DMR    | 0.5264416 | 0.004998027  | 0.5214436 | 0.0151973 | 0.4758516 | 0.5670355 |
| 7 | 154863176 | cg25058023 | HTR5A:TSS-DMR    | 0.4971958 | -0.007824882 | 0.5052027 | 0.0400645 | 0.3848271 | 0.6252142 |
| 7 | 154863244 | cg03024742 | HTR5A:TSS-DMR    | 0.631358  | 0.008346073  | 0.6230119 | 0.0215499 | 0.5583622 | 0.6876617 |
| 7 | 154863338 | cg10538202 | HTR5A:TSS-DMR    | 0.6188664 | -0.032085318 | 0.6509517 | 0.0286244 | 0.5650786 | 0.7368249 |
| 7 | 154863381 | cg09623773 | HTR5A:TSS-DMR    | 0.7422143 | 0.026839273  | 0.715375  | 0.0435595 | 0.5846966 | 0.8460534 |
| 8 | 37605359  | cg11496432 | ERLIN2:nt6-DMR   | 0.6400954 | -0.002122555 | 0.642218  | 0.0207909 | 0.5798454 | 0.7045905 |



|    |           |            |                 |           |              |           |           |           |           |
|----|-----------|------------|-----------------|-----------|--------------|-----------|-----------|-----------|-----------|
| 8  | 37605517  | cg13346869 | ERLIN2:Int6-DMR | 0.5277536 | -0.001362773 | 0.5291164 | 0.0579607 | 0.3552342 | 0.7029986 |
| 8  | 37605552  | cg05020125 | ERLIN2:Int6-DMR | 0.4255379 | -0.010119673 | 0.4356576 | 0.0203238 | 0.3746861 | 0.4966291 |
| 8  | 37605717  | cg21505509 | ERLIN2:Int6-DMR | 0.5833045 | 0.010880973  | 0.5724235 | 0.0299914 | 0.4824493 | 0.6623977 |
| 8  | 37605783  | cg08247852 | ERLIN2:Int6-DMR | 0.557588  | -0.003205409 | 0.5607934 | 0.0257449 | 0.4835588 | 0.638028  |
| 8  | 37605936  | cg09188212 | ERLIN2:Int6-DMR | 0.7827887 | 0.0297993    | 0.7529894 | 0.015632  | 0.7060935 | 0.7998853 |
| 8  | 37605978  | cg00450319 | ERLIN2:Int6-DMR | 0.6741515 | 0.027495409  | 0.6466561 | 0.0171669 | 0.5951555 | 0.6981567 |
| 8  | 141108607 | cg21926091 | PEG13:TSS-DMR   | 0.7150186 | 0.034073009  | 0.6809456 | 0.015873  | 0.6333266 | 0.7285646 |
| 8  | 141108998 | cg22502459 | PEG13:TSS-DMR   | 0.6687685 | 0.019329664  | 0.6494388 | 0.0157112 | 0.6023052 | 0.6965725 |
| 8  | 141109051 | cg13713522 | PEG13:TSS-DMR   | 0.7230406 | 0.019897336  | 0.7031433 | 0.0298223 | 0.6136764 | 0.7926102 |
| 8  | 141109731 | cg07878171 | PEG13:TSS-DMR   | 0.6295763 | -0.006849436 | 0.6364257 | 0.0197565 | 0.5771563 | 0.6956951 |
| 8  | 141110260 | cg03803002 | PEG13:TSS-DMR   | 0.6235736 | 0.009851173  | 0.6137224 | 0.0198378 | 0.554209  | 0.6732359 |
| 8  | 141110747 | cg00155882 | PEG13:TSS-DMR   | 0.5165862 | 0.003801455  | 0.5127847 | 0.0180115 | 0.4587502 | 0.5668192 |
| 8  | 141110900 | cg22807877 | PEG13:TSS-DMR   | 0.5195783 | 0.010317691  | 0.5092606 | 0.016337  | 0.4602495 | 0.5582717 |
| 8  | 141111080 | cg08626916 | PEG13:TSS-DMR   | 0.6167625 | 0.0350798    | 0.5816827 | 0.021194  | 0.5181006 | 0.6452648 |
| 10 | 121578137 | cg02722214 | INPP5F:Int2-DMR | 0.6320639 | -0.025751227 | 0.6578151 | 0.0220931 | 0.5915359 | 0.7240944 |
| 10 | 121578384 | cg20365618 | INPP5F:Int2-DMR | 0.5828042 | -0.0134572   | 0.5962614 | 0.0149729 | 0.5513427 | 0.6411801 |
| 10 | 121578561 | cg02857557 | INPP5F:Int2-DMR | 0.6941196 | -0.015482464 | 0.7096021 | 0.0263992 | 0.6304045 | 0.7887996 |
| 10 | 121578639 | cg25045785 | INPP5F:Int2-DMR | 0.6702387 | -0.015591991 | 0.6858307 | 0.0253742 | 0.609708  | 0.7619534 |
| 11 | 2019079   | cg11753499 | H19/IGF2:IG-DMR | 0.5569189 | -0.067526618 | 0.6220545 | 0.010614  | 0.5902125 | 0.6538966 |
| 11 | 2019090   | cg13210239 | H19/IGF2:IG-DMR | 0.4273687 | -0.109816782 | 0.5371855 | 0.0339647 | 0.4352914 | 0.6390795 |
| 11 | 2019116   | cg17985533 | H19/IGF2:IG-DMR | 0.5761077 | -0.066251518 | 0.6423592 | 0.03041   | 0.5511291 | 0.7335893 |
| 11 | 2019129   | cg15922305 | H19/IGF2:IG-DMR | 0.5619968 | -0.066246518 | 0.6282433 | 0.0363891 | 0.5190759 | 0.7374107 |
| 11 | 2019167   | cg25289899 | H19/IGF2:IG-DMR | 0.3703955 | -0.144255682 | 0.5146512 | 0.0730972 | 0.2953596 | 0.7339428 |
| 11 | 2019436   | cg09701145 | H19/IGF2:IG-DMR | 0.477055  | -0.099087873 | 0.5761429 | 0.0251361 | 0.5007347 | 0.651551  |
| 11 | 2019452   | cg25437674 | H19/IGF2:IG-DMR | 0.4161764 | -0.0958167   | 0.5119931 | 0.0102426 | 0.4812652 | 0.542721  |
| 11 | 2019568   | cg17769238 | H19/IGF2:IG-DMR | 0.5243881 | -0.064799155 | 0.5891873 | 0.0106183 | 0.5573324 | 0.6210422 |
| 11 | 2019587   | cg04975775 | H19/IGF2:IG-DMR | 0.4484537 | -0.103656391 | 0.5521101 | 0.0445735 | 0.4183897 | 0.6858305 |
| 11 | 2019606   | cg15886040 | H19/IGF2:IG-DMR | 0.5181898 | -0.077743891 | 0.5959337 | 0.0374425 | 0.494706  | 0.6971613 |
| 11 | 2019624   | cg10154633 | H19/IGF2:IG-DMR | 0.5347043 | -0.056555964 | 0.5912603 | 0.0227289 | 0.5230736 | 0.6594469 |
| 11 | 2019626   | cg26469586 | H19/IGF2:IG-DMR | 0.49009   | -0.041942482 | 0.5320325 | 0.0154895 | 0.4855639 | 0.578501  |
| 11 | 2019655   | cg24409677 | H19/IGF2:IG-DMR | 0.5525873 | -0.057290827 | 0.6098781 | 0.0239599 | 0.5379985 | 0.6817578 |
| 11 | 2019667   | cg16303279 | H19/IGF2:IG-DMR | 0.5099586 | -0.067526618 | 0.5774852 | 0.0199298 | 0.5176957 | 0.6372747 |
| 11 | 2019730   | cg02694715 | H19/IGF2:IG-DMR | 0.5616329 | -0.030212236 | 0.5918451 | 0.0124428 | 0.5545167 | 0.6291736 |
| 11 | 2019732   | cg11735853 | H19/IGF2:IG-DMR | 0.4932342 | -0.0472534   | 0.5404876 | 0.0176872 | 0.4874261 | 0.5935491 |
| 11 | 2019736   | cg01977486 | H19/IGF2:IG-DMR | 0.6284156 | -0.048026082 | 0.6764417 | 0.0134109 | 0.636209  | 0.7166744 |
| 11 | 2019798   | cg25838645 | H19/IGF2:IG-DMR | 0.5102538 | -0.072405491 | 0.5826593 | 0.025259  | 0.5150722 | 0.6502463 |
| 11 | 2019823   | cg13581483 | H19/IGF2:IG-DMR | 0.499142  | -0.0538392   | 0.5529812 | 0.0189778 | 0.4960479 | 0.6099145 |
| 11 | 2019859   | cg04088212 | H19/IGF2:IG-DMR | 0.5454711 | -0.095521609 | 0.6409927 | 0.0284368 | 0.5556824 | 0.7263031 |
| 11 | 2019862   | cg01539474 | H19/IGF2:IG-DMR | 0.5573161 | -0.070384391 | 0.6277005 | 0.0223662 | 0.5606018 | 0.6947991 |
| 11 | 2019930   | cg18362496 | H19/IGF2:IG-DMR | 0.4634848 | -0.047015564 | 0.5105004 | 0.0161541 | 0.462038  | 0.5589622 |
| 11 | 2019943   | cg24605090 | H19/IGF2:IG-DMR | 0.5187417 | -0.045548027 | 0.5642897 | 0.0197829 | 0.5049411 | 0.6236384 |
| 11 | 2020030   | cg06749854 | H19/IGF2:IG-DMR | 0.5422798 | -0.075892618 | 0.6181724 | 0.0235455 | 0.5475358 | 0.688809  |
| 11 | 2020036   | cg24510613 | H19/IGF2:IG-DMR | 0.4968688 | -0.071721291 | 0.5685901 | 0.0114266 | 0.5343104 | 0.6028698 |
| 11 | 2020101   | cg16675558 | H19/IGF2:IG-DMR | 0.7309617 | -0.049565764 | 0.7805275 | 0.0232568 | 0.710757  | 0.8502979 |
| 11 | 2020104   | cg03996735 | H19/IGF2:IG-DMR | 0.6675228 | -0.0692315   | 0.7367543 | 0.0321494 | 0.6403061 | 0.8332025 |
| 11 | 2020118   | cg18104242 | H19/IGF2:IG-DMR | 0.7042579 | -0.062684173 | 0.7669421 | 0.0289295 | 0.6801536 | 0.8537306 |
| 11 | 2020129   | cg27300742 | H19/IGF2:IG-DMR | 0.5401224 | -0.066868355 | 0.6069908 | 0.0222905 | 0.5401191 | 0.6738624 |
| 11 | 2020279   | cg25281616 | H19/IGF2:IG-DMR | 0.5387889 | -0.0459793   | 0.5847682 | 0.0162511 | 0.5360148 | 0.6335216 |
| 11 | 2020286   | cg01895612 | H19/IGF2:IG-DMR | 0.511108  | -0.047221445 | 0.5583294 | 0.0163814 | 0.5091854 | 0.6074735 |
| 11 | 2020296   | cg23476401 | H19/IGF2:IG-DMR | 0.5407081 | -0.061499227 | 0.6022073 | 0.019215  | 0.5445622 | 0.6598525 |
| 11 | 2020314   | cg00237904 | H19/IGF2:IG-DMR | 0.4889621 | -0.075836173 | 0.5647983 | 0.0254213 | 0.4885344 | 0.6410621 |
| 11 | 2020391   | cg06765785 | H19/IGF2:IG-DMR | 0.4244049 | -0.075501591 | 0.4999065 | 0.0165034 | 0.4503962 | 0.5494168 |
| 11 | 2020417   | cg25821896 | H19/IGF2:IG-DMR | 0.5389909 | -0.056730073 | 0.596621  | 0.0135794 | 0.5558827 | 0.6373593 |
| 11 | 2020496   | cg25574978 | H19/IGF2:IG-DMR | 0.5429146 | -0.033115118 | 0.5760297 | 0.0191124 | 0.5186927 | 0.6333668 |
| 11 | 2020537   | cg18454954 | H19/IGF2:IG-DMR | 0.4630322 | -0.030151364 | 0.4931836 | 0.0141995 | 0.450585  | 0.5357821 |
| 11 | 2020549   | cg25579157 | H19/IGF2:IG-DMR | 0.5131997 | -0.025158327 | 0.538358  | 0.0122103 | 0.5017271 | 0.5749889 |
| 11 | 2020556   | cg02886509 | H19/IGF2:IG-DMR | 0.4248658 | -0.078541127 | 0.5034069 | 0.0267228 | 0.4232386 | 0.5835753 |
| 11 | 2020560   | cg02657360 | H19/IGF2:IG-DMR | 0.4086723 | -0.048219227 | 0.4568915 | 0.017194  | 0.4053096 | 0.5084735 |
| 11 | 2021103   | cg27372170 | H19/IGF2:IG-DMR | 0.626014  | -0.000251982 | 0.626266  | 0.0203235 | 0.5652956 | 0.6872364 |
| 11 | 2021243   | cg22259242 | H19/IGF2:IG-DMR | 0.5562934 | 0.007717782  | 0.5485756 | 0.021236  | 0.4848675 | 0.6122837 |
| 11 | 2021658   | cg19177307 | H19/IGF2:IG-DMR | 0.5928013 | -0.010199264 | 0.6030006 | 0.0135958 | 0.5622133 | 0.6437879 |
| 11 | 2021915   | cg01585333 | H19/IGF2:IG-DMR | 0.5637922 | -0.0050237   | 0.5688159 | 0.0253607 | 0.4927338 | 0.644898  |
| 11 | 2022021   | cg06982169 | H19/IGF2:IG-DMR | 0.6895005 | 0.023920573  | 0.6655799 | 0.0861865 | 0.4070206 | 0.9241393 |
| 11 | 2022324   | cg16574793 | H19/IGF2:IG-DMR | 0.5858428 | -0.008404245 | 0.594247  | 0.0201118 | 0.5339117 | 0.6545824 |
| 11 | 2022386   | cg09452478 | H19/IGF2:IG-DMR | 0.5383947 | 0.003840682  | 0.534554  | 0.0194976 | 0.4760614 | 0.5930467 |
| 11 | 2023450   | cg02864690 | H19/IGF2:IG-DMR | 0.535144  | -0.047105018 | 0.582249  | 0.0209908 | 0.5192767 | 0.6452213 |
| 11 | 2023865   | cg20891060 | H19/IGF2:IG-DMR | 0.6372507 | -0.013193345 | 0.650444  | 0.0235503 | 0.5797932 | 0.7210949 |
| 11 | 2024126   | cg19024989 | H19/IGF2:IG-DMR | 0.6035669 | -0.014015936 | 0.6175828 | 0.0151307 | 0.5721908 | 0.6629748 |
| 11 | 2153991   | cg02807948 | IGF2:Ex9-DMR    | 0.4889074 | -0.028077827 | 0.5169852 | 0.0187071 | 0.4608638 | 0.5731067 |
| 11 | 2154074   | cg12528452 | IGF2:Ex9-DMR    | 0.5939729 | -0.0405188   | 0.6344917 | 0.0250718 | 0.5592763 | 0.7097071 |
| 11 | 2154113   | cg13165070 | IGF2:Ex9-DMR    | 0.3622051 | -0.038136545 | 0.4003416 | 0.0245118 | 0.3268063 | 0.473877  |
| 11 | 2154132   | cg11717189 | IGF2:Ex9-DMR    | 0.3755741 | -0.062633218 | 0.4382073 | 0.0328216 | 0.3397426 | 0.5366721 |
| 11 | 2154255   | cg07096953 | IGF2:Ex9-DMR    | 0.2581349 | -0.073650827 | 0.3317857 | 0.018799  | 0.2753888 | 0.3881827 |
| 11 | 2154386   | cg02613624 | IGF2:Ex9-DMR    | 0.5848997 | -0.037908155 | 0.6228079 | 0.0133586 | 0.5827321 | 0.6628836 |
| 11 | 2154432   | cg22956483 | IGF2:Ex9-DMR    | 0.3146766 | -0.038959255 | 0.3536359 | 0.0227773 | 0.2853038 | 0.4219679 |
| 11 | 2154638   | cg26401390 | IGF2:Ex9-DMR    | 0.5134489 | -0.0323066   | 0.5457555 | 0.0108869 | 0.5130949 | 0.5784161 |
| 11 | 2154934   | cg05384664 | IGF2:Ex9-DMR    | 0.597232  | -0.028623609 | 0.6258556 | 0.0162678 | 0.5770523 | 0.674659  |
| 11 | 2154952   | cg00570518 | IGF2:Ex9-DMR    | 0.5579205 | -0.026350764 | 0.5842713 | 0.0149616 | 0.5393864 | 0.6291561 |
| 11 | 2168625   | cg19642877 | IGF2:alt-TSS    | 0.539409  | -0.035477155 | 0.5748862 | 0.0179138 | 0.5211447 | 0.6286276 |

|    |           |            |                  |           |              |           |           |           |           |
|----|-----------|------------|------------------|-----------|--------------|-----------|-----------|-----------|-----------|
| 11 | 2720229   | cg27119222 | KCNQ1OT1:TSS-DMR | 0.6765351 | 0.023616418  | 0.6529187 | 0.0176419 | 0.5999929 | 0.7058445 |
| 11 | 2720463   | cg00000924 | KCNQ1OT1:TSS-DMR | 0.5928181 | 0.023719845  | 0.5690983 | 0.012816  | 0.5306501 | 0.6075464 |
| 11 | 2720810   | cg11297256 | KCNQ1OT1:TSS-DMR | 0.6320696 | -0.001766464 | 0.6338361 | 0.0211469 | 0.5703953 | 0.6972768 |
| 11 | 2721207   | cg14392746 | KCNQ1OT1:TSS-DMR | 0.5702896 | 0.019553455  | 0.5507361 | 0.0235184 | 0.4801808 | 0.6212915 |
| 11 | 2721243   | cg12077660 | KCNQ1OT1:TSS-DMR | 0.5465612 | 0.011238627  | 0.5353226 | 0.0195477 | 0.4766795 | 0.5939656 |
| 11 | 2721248   | cg03401726 | KCNQ1OT1:TSS-DMR | 0.550069  | -0.005429291 | 0.5554983 | 0.0146718 | 0.5114829 | 0.5995137 |
| 11 | 2721336   | cg16739686 | KCNQ1OT1:TSS-DMR | 0.5770524 | 0.020571236  | 0.5564812 | 0.0274027 | 0.4742731 | 0.6386892 |
| 11 | 2721351   | cg08359167 | KCNQ1OT1:TSS-DMR | 0.5202184 | -0.0058531   | 0.5260715 | 0.0168578 | 0.4754981 | 0.5766449 |
| 11 | 2721366   | cg08446215 | KCNQ1OT1:TSS-DMR | 0.6072333 | 0.034565373  | 0.5726679 | 0.03353   | 0.4720778 | 0.6732581 |
| 11 | 2721383   | cg26104781 | KCNQ1OT1:TSS-DMR | 0.6221972 | 0.035098436  | 0.5870988 | 0.0319024 | 0.4913917 | 0.6828058 |
| 11 | 2721409   | cg02219360 | KCNQ1OT1:TSS-DMR | 0.5727867 | 0.0303151    | 0.5424716 | 0.0312946 | 0.4485879 | 0.6363553 |
| 11 | 2721428   | cg20699737 | KCNQ1OT1:TSS-DMR | 0.5746276 | 0.025712236  | 0.5489154 | 0.0336739 | 0.4478937 | 0.649937  |
| 11 | 2721437   | cg26547719 | KCNQ1OT1:TSS-DMR | 0.5361654 | 0.0138678    | 0.5222976 | 0.0260048 | 0.4442832 | 0.600312  |
| 11 | 2721480   | cg07595203 | KCNQ1OT1:TSS-DMR | 0.4723673 | 0.032914209  | 0.4394531 | 0.0280447 | 0.3553189 | 0.5235873 |
| 11 | 2721591   | cg09518720 | KCNQ1OT1:TSS-DMR | 0.6212664 | 0.0193476    | 0.6019188 | 0.0369198 | 0.4911593 | 0.7126783 |
| 11 | 2721610   | cg14958441 | KCNQ1OT1:TSS-DMR | 0.5249326 | 0.015310773  | 0.5096218 | 0.0152793 | 0.4637839 | 0.5554597 |
| 11 | 2721619   | cg27323091 | KCNQ1OT1:TSS-DMR | 0.555064  | 0.014202955  | 0.540861  | 0.0142402 | 0.4981404 | 0.5835817 |
| 11 | 2721632   | cg01873334 | KCNQ1OT1:TSS-DMR | 0.6767731 | 0.001541264  | 0.6752318 | 0.0200149 | 0.6151871 | 0.7352766 |
| 11 | 2721799   | cg05816130 | KCNQ1OT1:TSS-DMR | 0.6277732 | 0.0024196509 | 0.6035355 | 0.0136398 | 0.5626161 | 0.6444549 |
| 11 | 2721817   | cg14243741 | KCNQ1OT1:TSS-DMR | 0.6537364 | 0.018601982  | 0.6351344 | 0.0131006 | 0.5958325 | 0.6744363 |
| 11 | 2721857   | cg21137515 | KCNQ1OT1:TSS-DMR | 0.6299779 | 0.022859918  | 0.607118  | 0.011374  | 0.5729959 | 0.64124   |
| 11 | 2721866   | cg05740879 | KCNQ1OT1:TSS-DMR | 0.6521242 | 0.013081918  | 0.6390423 | 0.0167219 | 0.5888767 | 0.6892079 |
| 11 | 2721952   | cg01893176 | KCNQ1OT1:TSS-DMR | 0.5199384 | 0.011288764  | 0.5086496 | 0.0126094 | 0.4708215 | 0.5464778 |
| 11 | 2721961   | cg11993252 | KCNQ1OT1:TSS-DMR | 0.6060042 | 0.013550227  | 0.592454  | 0.0128898 | 0.5537847 | 0.6311233 |
| 11 | 2722062   | cg11666921 | KCNQ1OT1:TSS-DMR | 0.472666  | -0.019569555 | 0.4922356 | 0.0239907 | 0.4202634 | 0.5642077 |
| 11 | 2722073   | cg26094482 | KCNQ1OT1:TSS-DMR | 0.4604272 | 0.000552791  | 0.4598744 | 0.0140404 | 0.4177533 | 0.5019955 |
| 11 | 2722082   | cg03422070 | KCNQ1OT1:TSS-DMR | 0.6225312 | 0.013122673  | 0.6094085 | 0.0105791 | 0.5776712 | 0.6411459 |
| 11 | 2722084   | cg15651941 | KCNQ1OT1:TSS-DMR | 0.5735396 | 0.014246336  | 0.5592933 | 0.0178588 | 0.5057169 | 0.6128697 |
| 11 | 2722086   | cg25306939 | KCNQ1OT1:TSS-DMR | 0.5877236 | 0.015602182  | 0.5721214 | 0.0110998 | 0.5388221 | 0.6054207 |
| 11 | 2722119   | cg06288089 | KCNQ1OT1:TSS-DMR | 0.5328559 | 0.0339417    | 0.4989142 | 0.016956  | 0.4480463 | 0.5497821 |
| 11 | 2722195   | cg02798157 | KCNQ1OT1:TSS-DMR | 0.5845579 | 0.019212891  | 0.565345  | 0.0161721 | 0.5168286 | 0.6138614 |
| 11 | 2722258   | cg27604721 | KCNQ1OT1:TSS-DMR | 0.6198991 | -0.006661136 | 0.6265602 | 0.0134764 | 0.5861311 | 0.6669894 |
| 13 | 48892551  | cg27182551 | RB1:Int2-DMR     | 0.6723116 | -0.019747655 | 0.6920593 | 0.0268439 | 0.6115276 | 0.7725909 |
| 13 | 48892948  | cg19427472 | RB1:Int2-DMR     | 0.6520948 | -0.002001255 | 0.6540961 | 0.0203149 | 0.5931514 | 0.7150407 |
| 13 | 48893174  | cg13431205 | RB1:Int2-DMR     | 0.536038  | 0.015767318  | 0.5202707 | 0.0175099 | 0.4677408 | 0.5728005 |
| 13 | 48893376  | cg03085377 | RB1:Int2-DMR     | 0.5190378 | 0.027084245  | 0.4919536 | 0.0232828 | 0.4221051 | 0.561802  |
| 13 | 48893727  | cg18481241 | RB1:Int2-DMR     | 0.5354028 | 0.040281255  | 0.4951215 | 0.0168259 | 0.4446439 | 0.5455992 |
| 13 | 48893968  | cg16153267 | RB1:Int2-DMR     | 0.4030024 | 0.027285873  | 0.3757165 | 0.0122951 | 0.3388312 | 0.4126019 |
| 13 | 48894214  | cg25676335 | RB1:Int2-DMR     | 0.663223  | -0.002296991 | 0.66552   | 0.0082383 | 0.6408051 | 0.6902349 |
| 13 | 48894382  | cg00059930 | RB1:Int2-DMR     | 0.551289  | 0.007971491  | 0.5433175 | 0.0133144 | 0.5033743 | 0.5832746 |
| 13 | 48894595  | cg26119796 | RB1:Int2-DMR     | 0.5027417 | 0.011487618  | 0.4912541 | 0.0161168 | 0.4429038 | 0.5396044 |
| 13 | 48895173  | cg19254235 | RB1:Int2-DMR     | 0.5832275 | 0.005971773  | 0.5772557 | 0.0205775 | 0.5155233 | 0.6389882 |
| 13 | 48895241  | cg26740195 | RB1:Int2-DMR     | 0.5345027 | 0.008131145  | 0.5263716 | 0.0104616 | 0.4949869 | 0.5577562 |
| 13 | 48895318  | cg27026713 | RB1:Int2-DMR     | 0.6097808 | 0.000683764  | 0.609097  | 0.0228175 | 0.5406444 | 0.6775496 |
| 13 | 48895478  | cg07880715 | RB1:Int2-DMR     | 0.659754  | 0.002178491  | 0.6575755 | 0.0164907 | 0.6081035 | 0.7070475 |
| 14 | 101290556 | cg00764369 | MEG3:TSS-DMR     | 0.4933982 | -0.221038555 | 0.7144368 | 0.0360241 | 0.6063646 | 0.8225089 |
| 14 | 101290717 | cg10515315 | MEG3:TSS-DMR     | 0.3203133 | -0.233634745 | 0.553948  | 0.0149889 | 0.5089812 | 0.5989149 |
| 14 | 101290867 | cg15991553 | MEG3:TSS-DMR     | 0.3381327 | -0.256437945 | 0.5945706 | 0.0190425 | 0.5374431 | 0.6516982 |
| 14 | 101291068 | cg23870378 | MEG3:TSS-DMR     | 0.387756  | -0.188555791 | 0.5763118 | 0.0173325 | 0.5243143 | 0.6283093 |
| 14 | 101291100 | cg14034270 | MEG3:TSS-DMR     | 0.6699093 | -0.0975098   | 0.7674191 | 0.0209811 | 0.7044759 | 0.8303623 |
| 14 | 101291136 | cg16567044 | MEG3:TSS-DMR     | 0.5176239 | -0.041804609 | 0.5594285 | 0.0202217 | 0.4987634 | 0.6200937 |
| 14 | 101291180 | cg10540302 | MEG3:TSS-DMR     | 0.4652876 | -0.0697831   | 0.5350707 | 0.0167058 | 0.4849533 | 0.5851881 |
| 14 | 101291288 | cg02313552 | MEG3:TSS-DMR     | 0.5548627 | -0.1431661   | 0.6980288 | 0.0325078 | 0.6005054 | 0.7955162 |
| 14 | 101291410 | cg02982753 | MEG3:TSS-DMR     | 0.3459208 | -0.214567636 | 0.5604884 | 0.0110223 | 0.5274215 | 0.5935553 |
| 14 | 101291440 | cg02888166 | MEG3:TSS-DMR     | 0.4839814 | -0.153481127 | 0.6374625 | 0.0223067 | 0.5705424 | 0.7043826 |
| 14 | 101291459 | cg24089209 | MEG3:TSS-DMR     | 0.4285262 | -0.168896218 | 0.5974224 | 0.0146129 | 0.5535838 | 0.641261  |
| 14 | 101291469 | cg16738180 | MEG3:TSS-DMR     | 0.5242405 | -0.0998897   | 0.6241302 | 0.0200425 | 0.5640027 | 0.6842577 |
| 14 | 101291500 | cg19643803 | MEG3:TSS-DMR     | 0.3961833 | -0.187910245 | 0.5840935 | 0.0132815 | 0.5442492 | 0.6239379 |
| 14 | 101291571 | cg10943497 | MEG3:TSS-DMR     | 0.4886064 | -0.219085882 | 0.7076923 | 0.0256341 | 0.6307899 | 0.7845947 |
| 14 | 101291602 | cg10065153 | MEG3:TSS-DMR     | 0.4195171 | -0.187903018 | 0.6074201 | 0.0318687 | 0.5118142 | 0.7030261 |
| 14 | 101291687 | cg09280976 | MEG3:TSS-DMR     | 0.5187946 | -0.1173891   | 0.6361837 | 0.0153665 | 0.5900842 | 0.6822832 |
| 14 | 101291829 | cg22940816 | MEG3:TSS-DMR     | 0.3245012 | -0.206601636 | 0.5311028 | 0.0124446 | 0.4937689 | 0.5684368 |
| 14 | 101291856 | cg14070323 | MEG3:TSS-DMR     | 0.3015412 | -0.306436482 | 0.6079777 | 0.0276158 | 0.5251302 | 0.6908252 |
| 14 | 101291891 | cg14119337 | MEG3:TSS-DMR     | 0.2470936 | -0.228216355 | 0.47531   | 0.0203685 | 0.4142044 | 0.5364155 |
| 14 | 101291933 | cg20952167 | MEG3:TSS-DMR     | 0.2532074 | -0.253528709 | 0.5067361 | 0.0292058 | 0.4191186 | 0.5943537 |
| 14 | 101291997 | cg12967319 | MEG3:TSS-DMR     | 0.2879412 | -0.245852082 | 0.5337933 | 0.0130733 | 0.4945734 | 0.5730131 |
| 14 | 101292128 | cg04304932 | MEG3:TSS-DMR     | 0.294639  | -0.290441764 | 0.5850808 | 0.0153932 | 0.538901  | 0.6312605 |
| 14 | 101292149 | cg04576764 | MEG3:TSS-DMR     | 0.2893611 | -0.303197373 | 0.5925585 | 0.0219305 | 0.526767  | 0.6583499 |
| 14 | 101292306 | cg25836301 | MEG3:TSS-DMR     | 0.3168771 | -0.263782609 | 0.5806597 | 0.0130651 | 0.5414643 | 0.6198552 |
| 14 | 101292392 | cg09926418 | MEG3:TSS-DMR     | 0.3000828 | -0.2902658   | 0.5903486 | 0.0188025 | 0.5339412 | 0.6471952 |
| 14 | 101292643 | cg23176399 | MEG3:TSS-DMR     | 0.3027038 | -0.2261776   | 0.5288814 | 0.0143463 | 0.4858426 | 0.571906  |
| 14 | 101292680 | cg05711886 | MEG3:TSS-DMR     | 0.3529263 | -0.225621464 | 0.5785478 | 0.0186152 | 0.5227021 | 0.6343934 |
| 14 | 101292872 | cg15419911 | MEG3:TSS-DMR     | 0.3084355 | -0.286194713 | 0.5946297 | 0.0274398 | 0.5123103 | 0.676949  |
| 14 | 101293090 | cg15373285 | MEG3:TSS-DMR     | 0.3073328 | -0.238087718 | 0.5454205 | 0.0190259 | 0.4883429 | 0.6024981 |
| 14 | 101293450 | cg14123427 | MEG3:TSS-DMR     | 0.3390991 | -0.189666982 | 0.5287661 | 0.0147156 | 0.4846193 | 0.5729128 |
| 14 | 101293726 | cg15101633 | MEG3:TSS-DMR     | 0.3503993 | -0.212651873 | 0.5630512 | 0.0157973 | 0.5156592 | 0.6104431 |
| 14 | 101293856 | cg26374305 | MEG3:TSS-DMR     | 0.3222083 | -0.267350127 | 0.5895584 | 0.0446374 | 0.4556461 | 0.7234707 |
| 14 | 101370989 | cg06804177 | MEG8:Int2-DMR    | 0.7367616 | 0.194870591  | 0.541891  | 0.0248057 | 0.4674738 | 0.6163082 |
| 15 | 23807180  | cg17819168 | MKR3:TSS-DMR     | 0.7130679 | -0.0128483   | 0.7259162 | 0.0223405 | 0.6588947 | 0.7929377 |

|    |          |            |                   |           |              |           |           |           |           |
|----|----------|------------|-------------------|-----------|--------------|-----------|-----------|-----------|-----------|
| 15 | 23807234 | cg13423098 | MKRN3:TSS-DMR     | 0.5387024 | -0.002497545 | 0.5411999 | 0.0302095 | 0.4505714 | 0.6318285 |
| 15 | 23810163 | cg09437135 | MKRN3:TSS-DMR     | 0.8279614 | -0.016585827 | 0.8445472 | 0.0186841 | 0.7884948 | 0.9005996 |
| 15 | 23810238 | cg20769842 | MKRN3:TSS-DMR     | 0.7967378 | -0.017044882 | 0.8137827 | 0.0228523 | 0.7452257 | 0.8823397 |
| 15 | 23810280 | cg16131766 | MKRN3:TSS-DMR     | 0.8727709 | -0.0094258   | 0.8821967 | 0.0160446 | 0.8340628 | 0.9303306 |
| 15 | 23810334 | cg20792895 | MKRN3:TSS-DMR     | 0.904354  | -0.018308509 | 0.9226625 | 0.0225452 | 0.8550268 | 0.9902982 |
| 15 | 23810378 | cg05952543 | MKRN3:TSS-DMR     | 0.887573  | -0.0030001   | 0.890574  | 0.0146123 | 0.8467372 | 0.9344108 |
| 15 | 23810652 | cg27046052 | MKRN3:TSS-DMR     | 0.790598  | -0.001021445 | 0.7916194 | 0.1095853 | 0.4628635 | 1.1203754 |
| 15 | 23810861 | cg11100640 | MKRN3:TSS-DMR     | 0.8267598 | -0.024028182 | 0.850788  | 0.020767  | 0.7884869 | 0.9130891 |
| 15 | 23811205 | cg23234999 | MKRN3:TSS-DMR     | 0.8116753 | -0.026243491 | 0.8379188 | 0.0194173 | 0.7796668 | 0.8961708 |
| 15 | 23811369 | cg19903927 | MKRN3:TSS-DMR     | 0.7387767 | -0.047672436 | 0.7864491 | 0.0332247 | 0.686775  | 0.8861232 |
| 15 | 23812334 | cg07760796 | MKRN3:TSS-DMR     | 0.8656992 | -0.013630527 | 0.8793297 | 0.0112619 | 0.8455441 | 0.9131153 |
| 15 | 23892574 | cg20747630 | MAGEL2:TSS-DMR    | 0.6145458 | -0.006153636 | 0.6206994 | 0.0211188 | 0.557343  | 0.6840558 |
| 15 | 23892656 | cg04142555 | MAGEL2:TSS-DMR    | 0.630088  | 0.021740645  | 0.6083474 | 0.0239748 | 0.5364229 | 0.6802718 |
| 15 | 23892770 | cg14432018 | MAGEL2:TSS-DMR    | 0.6525091 | 0.029203691  | 0.6233054 | 0.0124788 | 0.585869  | 0.6607418 |
| 15 | 23893025 | cg19961998 | MAGEL2:TSS-DMR    | 0.5164475 | 0.040307845  | 0.4761397 | 0.0289358 | 0.3893323 | 0.562947  |
| 15 | 23893040 | cg18253764 | MAGEL2:TSS-DMR    | 0.5062156 | 0.006951373  | 0.4992642 | 0.0159661 | 0.4513658 | 0.5471627 |
| 15 | 23893742 | cg22872376 | MAGEL2:TSS-DMR    | 0.4509062 | 0.004659282  | 0.4462469 | 0.030316  | 0.3552989 | 0.537195  |
| 15 | 23931451 | cg06743811 | NDN:TSS-DMR       | 0.6835766 | -0.023105391 | 0.706682  | 0.0108894 | 0.6740139 | 0.73935   |
| 15 | 23931674 | cg18602919 | NDN:TSS-DMR       | 0.6418664 | -0.029975955 | 0.6718424 | 0.0500299 | 0.5817526 | 0.7619321 |
| 15 | 23932370 | cg12532169 | NDN:TSS-DMR       | 0.5037931 | 0.043529045  | 0.4602641 | 0.0191151 | 0.4029189 | 0.5176092 |
| 15 | 23932373 | cg13828758 | NDN:TSS-DMR       | 0.5729367 | 0.031742618  | 0.5411941 | 0.0161164 | 0.4928449 | 0.5895433 |
| 15 | 23932397 | cg22694067 | NDN:TSS-DMR       | 0.5078565 | 0.052319527  | 0.455537  | 0.0286745 | 0.3695134 | 0.5415606 |
| 15 | 23932412 | cg26725891 | NDN:TSS-DMR       | 0.5807614 | 0.047154218  | 0.5336072 | 0.0296383 | 0.4446923 | 0.622522  |
| 15 | 23932620 | cg18552939 | NDN:TSS-DMR       | 0.4439768 | 0.060751227  | 0.3832256 | 0.0237476 | 0.3119829 | 0.4544682 |
| 15 | 23932758 | cg01989224 | NDN:TSS-DMR       | 0.6187767 | -0.026192918 | 0.6449696 | 0.031092  | 0.5516936 | 0.7382457 |
| 15 | 24346942 | cg09985260 |                   | 0.5378052 | 0.009129864  | 0.5286753 | 0.0262845 | 0.4498217 | 0.607529  |
| 15 | 24347063 | cg14555733 |                   | 0.4887022 | -0.0056165   | 0.4943187 | 0.0269118 | 0.4135833 | 0.5750541 |
| 15 | 24672032 | cg26288595 |                   | 0.6514387 | 0.050848282  | 0.6005904 | 0.0585726 | 0.4248726 | 0.7763082 |
| 15 | 24672285 | cg08449389 |                   | 0.2118048 | -0.0231973   | 0.2350021 | 0.0492848 | 0.0871478 | 0.3828564 |
| 15 | 24672463 | cg22261467 |                   | 0.3756776 | -0.018296327 | 0.3939739 | 0.0253999 | 0.3177742 | 0.4701736 |
| 15 | 24672531 | cg26708976 |                   | 0.4641632 | 0.001728809  | 0.4624344 | 0.0230064 | 0.3934153 | 0.5314535 |
| 15 | 24722944 | cg00374016 |                   | 0.4854053 | 0.024668473  | 0.4607368 | 0.0559765 | 0.2928074 | 0.6286662 |
| 15 | 25018132 | cg15298722 |                   | 0.3041247 | 0.053257164  | 0.2508675 | 0.0283566 | 0.1657979 | 0.3359372 |
| 15 | 25018227 | cg13495693 |                   | 0.4861854 | 0.0272364    | 0.458949  | 0.0302184 | 0.3682938 | 0.5496042 |
| 15 | 25018302 | cg00229754 |                   | 0.3577048 | 0.005085491  | 0.3526193 | 0.0287714 | 0.266305  | 0.4389336 |
| 15 | 25018449 | cg20707630 |                   | 0.2947138 | 0.014007318  | 0.2807065 | 0.0221555 | 0.2142399 | 0.3471731 |
| 15 | 25068564 | cg22491305 | SNRPN:alt-TSS-DMR | 0.837501  | 0.027615464  | 0.8098855 | 0.0225052 | 0.7423699 | 0.8774012 |
| 15 | 25068738 | cg11265941 | SNRPN:alt-TSS-DMR | 0.5398623 | -0.016871709 | 0.556734  | 0.0172363 | 0.505025  | 0.608443  |
| 15 | 25068754 | cg11826663 | SNRPN:alt-TSS-DMR | 0.5959485 | 0.005854018  | 0.5900945 | 0.0167548 | 0.5398301 | 0.6403588 |
| 15 | 25068757 | cg24785225 | SNRPN:alt-TSS-DMR | 0.6062745 | 0.007736391  | 0.5985381 | 0.0128984 | 0.5598429 | 0.6372333 |
| 15 | 25068763 | cg10271763 | SNRPN:alt-TSS-DMR | 0.5870005 | 0.002329973  | 0.5846705 | 0.0156123 | 0.5378335 | 0.6315076 |
| 15 | 25068769 | cg27304225 | SNRPN:alt-TSS-DMR | 0.611575  | 0.013347945  | 0.5982271 | 0.0151036 | 0.5529163 | 0.6435378 |
| 15 | 25068790 | cg19803984 | SNRPN:alt-TSS-DMR | 0.5238163 | 0.002247855  | 0.5215684 | 0.0192635 | 0.4637778 | 0.5793591 |
| 15 | 25068850 | cg16321029 | SNRPN:alt-TSS-DMR | 0.5109238 | -8.71909E-05 | 0.511011  | 0.0207495 | 0.4487624 | 0.5732596 |
| 15 | 25069376 | cg26033681 | SNRPN:alt-TSS-DMR | 0.6278529 | 0.030479327  | 0.5973736 | 0.0284468 | 0.5120331 | 0.682714  |
| 15 | 25093244 | cg25978208 | SNRPN:Int1-DMR1   | 0.4967384 | -0.037085809 | 0.5338242 | 0.0294034 | 0.4456141 | 0.6220343 |
| 15 | 25093366 | cg02171545 | SNRPN:Int1-DMR1   | 0.3679143 | -0.018894245 | 0.3868085 | 0.0584162 | 0.2115599 | 0.5620572 |
| 15 | 25093456 | cg02305723 | SNRPN:Int1-DMR1   | 0.4670864 | -0.007443836 | 0.4745302 | 0.0300437 | 0.3843991 | 0.5646614 |
| 15 | 25093521 | cg22678136 | SNRPN:Int1-DMR1   | 0.44306   | -0.030897864 | 0.4739579 | 0.0468237 | 0.3334866 | 0.6144291 |
| 15 | 25094139 | cg13887424 | SNRPN:Int1-DMR1   | 0.8803242 | 0.002657036  | 0.8776672 | 0.0094947 | 0.8491831 | 0.9061512 |
| 15 | 25123287 | cg27644292 | SNRPN:Int1-DMR2   | 0.611891  | 0.011494818  | 0.6003962 | 0.0239534 | 0.5285361 | 0.6722563 |
| 15 | 25123381 | cg08560373 | SNRPN:Int1-DMR2   | 0.4148766 | 0.045029964  | 0.3698466 | 0.0365542 | 0.2601842 | 0.4795091 |
| 15 | 25123491 | cg25657700 | SNRPN:Int1-DMR2   | 0.6176287 | -0.003442218 | 0.6210709 | 0.0562785 | 0.4522353 | 0.7899065 |
| 15 | 25123549 | cg24993443 | SNRPN:Int1-DMR2   | 0.518802  | 0.038429818  | 0.4803722 | 0.024435  | 0.4070672 | 0.5536772 |
| 15 | 25123688 | cg01786704 | SNRPN:Int1-DMR2   | 0.4492505 | -0.000307545 | 0.449558  | 0.061647  | 0.2646172 | 0.6344989 |
| 15 | 25123731 | cg21870668 | SNRPN:Int1-DMR2   | 0.5387175 | 0.014954182  | 0.5237633 | 0.0250447 | 0.4486293 | 0.5988973 |
| 15 | 25124213 | cg21061553 |                   | 0.8566232 | 0.000905491  | 0.8557177 | 0.0127608 | 0.8174354 | 0.8940001 |
| 15 | 25199270 | cg02152271 |                   | 0.8516996 | -0.0090359   | 0.8607355 | 0.0077794 | 0.8373974 | 0.8840736 |
| 15 | 25199713 | cg12298755 |                   | 0.7953832 | 0.001684291  | 0.7936989 | 0.0208111 | 0.7312655 | 0.8561323 |
| 15 | 25200253 | cg18506672 | SNRUF:TSS-DMR     | 0.5532163 | 0.008042082  | 0.5451742 | 0.0251663 | 0.4696752 | 0.6206732 |
| 15 | 25200406 | cg02125271 | SNRUF:TSS-DMR     | 0.70816   | 0.0247238    | 0.6834362 | 0.0216621 | 0.6184499 | 0.7484225 |
| 15 | 25200490 | cg26875073 | SNRUF:TSS-DMR     | 0.5389802 | -0.010877882 | 0.5498581 | 0.0399261 | 0.4300797 | 0.6696365 |
| 15 | 25201020 | cg22159025 | SNRUF:TSS-DMR     | 0.5798151 | 0.073338636  | 0.5064765 | 0.0309746 | 0.4135526 | 0.5994004 |
| 15 | 25201224 | cg22555495 | SNRUF:TSS-DMR     | 0.54295   | 0.001864736  | 0.5410853 | 0.0182667 | 0.4862853 | 0.5958853 |
| 15 | 25201429 | cg01614564 | SNRUF:TSS-DMR     | 0.6026339 | -0.000221282 | 0.6028552 | 0.0151097 | 0.557526  | 0.6481843 |
| 15 | 25201732 | cg13073261 | SNRUF:TSS-DMR     | 0.584655  | 0.040788545  | 0.5438665 | 0.0291909 | 0.4562938 | 0.6314391 |
| 15 | 99408636 | cg19322380 |                   | 0.6852337 | 0.020777282  | 0.6644564 | 0.0314578 | 0.5700831 | 0.7588297 |
| 15 | 99408804 | cg21746425 |                   | 0.5568296 | 0.029042327  | 0.5277873 | 0.033785  | 0.4264323 | 0.6291423 |
| 15 | 99408958 | cg12553689 |                   | 0.6223594 | 0.029163718  | 0.5931957 | 0.021855  | 0.5276307 | 0.6587606 |
| 15 | 99409194 | cg07615383 | IGF1R:Int2-DMR    | 0.5036473 | 0.016991973  | 0.4866553 | 0.02905   | 0.3995053 | 0.5738054 |
| 15 | 99409360 | cg00098799 | IGF1R:Int2-DMR    | 0.5784082 | 0.030919255  | 0.5474889 | 0.0425904 | 0.4197177 | 0.7326202 |
| 15 | 99409411 | cg13812291 | IGF1R:Int2-DMR    | 0.6007113 | -0.007219045 | 0.6079303 | 0.0316384 | 0.5130151 | 0.7028456 |
| 15 | 99409506 | cg03380198 | IGF1R:Int2-DMR    | 0.5966363 | 0.025575464  | 0.5710608 | 0.0332512 | 0.4713073 | 0.6708144 |
| 15 | 99409942 | cg25404375 |                   | 0.603549  | 0.051461     | 0.552088  | 0.0407926 | 0.4297101 | 0.6744659 |
| 15 | 99409948 | cg17074431 |                   | 0.6934785 | 0.027178445  | 0.6663001 | 0.0226489 | 0.5983534 | 0.7342467 |
| 15 | 99409957 | cg11544420 |                   | 0.6373245 | 0.026826436  | 0.6104981 | 0.025338  | 0.5344839 | 0.6865122 |
| 16 | 3481970  | cg02880119 | ZNF597:3'-DMR     | 0.6557009 | 0.002174145  | 0.6535268 | 0.0318113 | 0.5580928 | 0.7489607 |
| 16 | 3482078  | cg04027059 | ZNF597:3'-DMR     | 0.6799327 | 0.0066465    | 0.6732862 | 0.0313165 | 0.5793366 | 0.7672358 |
| 16 | 3493133  | cg06410284 | ZNF597:TSS-DMR    | 0.508882  | 0.006225409  | 0.5026566 | 0.021923  | 0.4368877 | 0.5684255 |



|    |          |             |                     |           |               |           |           |           |           |
|----|----------|-------------|---------------------|-----------|---------------|-----------|-----------|-----------|-----------|
| 16 | 3493336  | cg09596866  | ZNF597:TSS-DMR      | 0.4287093 | 0.014967627   | 0.4137417 | 0.0485419 | 0.268116  | 0.5593673 |
| 16 | 3493423  | cg10482201  | ZNF597:TSS-DMR      | 0.5577776 | 0.017631118   | 0.5401465 | 0.0452009 | 0.4045437 | 0.6757493 |
| 16 | 3493428  | cg24333473  | ZNF597:TSS-DMR      | 0.3506653 | 0.008490991   | 0.3421743 | 0.0419329 | 0.2163757 | 0.4679729 |
| 16 | 3493440  | cg03896694  | ZNF597:TSS-DMR      | 0.5616907 | 0.042919327   | 0.5187714 | 0.0456818 | 0.381726  | 0.6558167 |
| 16 | 3493534  | cg27136643  | ZNF597:TSS-DMR      | 0.5853598 | 0.009882518   | 0.5754773 | 0.0308661 | 0.4828788 | 0.6680757 |
| 16 | 3493614  | cg03933495  | ZNF597:TSS-DMR      | 0.4540284 | 0.018342027   | 0.4356864 | 0.0338315 | 0.3341919 | 0.5371809 |
| 16 | 3493681  | cg27460547  | ZNF597:TSS-DMR      | 0.5296268 | 0.023295518   | 0.5063313 | 0.032035  | 0.4102264 | 0.6024362 |
| 16 | 3493815  | cg26918062  | ZNF597:TSS-DMR      | 0.5023755 | 0.039838382   | 0.4625371 | 0.025015  | 0.387492  | 0.5375823 |
| 16 | 3493997  | cg14654875  | ZNF597:TSS-DMR      | 0.5486475 | 0.014621027   | 0.5340265 | 0.0215646 | 0.4693328 | 0.5987202 |
| 16 | 3494094  | cg10406676  | ZNF597:TSS-DMR      | 0.5552104 | 0.028903055   | 0.5263073 | 0.0300656 | 0.4361106 | 0.6165041 |
| 16 | 3494155  | cg06121207  | ZNF597:TSS-DMR      | 0.5566941 | 0.011789064   | 0.544905  | 0.0278651 | 0.4613098 | 0.6285003 |
| 19 | 54040774 | cg20646939  | ZNF331:alt-TSS-DMR1 | 0.5251881 | 0.008432727   | 0.5167554 | 0.0155426 | 0.4701276 | 0.5633832 |
| 19 | 54040813 | cg06855497  | ZNF331:alt-TSS-DMR1 | 0.5647159 | 0.023487882   | 0.541228  | 0.0147252 | 0.4970525 | 0.5854035 |
| 19 | 54040818 | cg15576576  | ZNF331:alt-TSS-DMR1 | 0.6025573 | 0.016118509   | 0.5864388 | 0.0179447 | 0.5326046 | 0.640273  |
| 19 | 54041163 | cg22475353  | ZNF331:alt-TSS-DMR1 | 0.3821808 | 0.000746709   | 0.3814341 | 0.0239488 | 0.3095876 | 0.4532806 |
| 19 | 54041251 | cg27296330  | ZNF331:alt-TSS-DMR1 | 0.4558443 | 0.026087618   | 0.4297567 | 0.0179929 | 0.3757779 | 0.4837355 |
| 19 | 54041303 | cg10023249  | ZNF331:alt-TSS-DMR1 | 0.2907017 | 0.030033009   | 0.2606687 | 0.0242701 | 0.1878583 | 0.3334791 |
| 19 | 54041308 | cg15607708  | ZNF331:alt-TSS-DMR1 | 0.3179553 | -0.001033236  | 0.3189885 | 0.0231213 | 0.2496245 | 0.3883525 |
| 19 | 54041329 | cg045282821 | ZNF331:alt-TSS-DMR1 | 0.5053216 | 0.026832818   | 0.4786888 | 0.0250465 | 0.4170493 | 0.603282  |
| 19 | 54041398 | cg05338009  | ZNF331:alt-TSS-DMR1 | 0.5042208 | 0.034494027   | 0.4697268 | 0.0565183 | 0.300172  | 0.6392815 |
| 19 | 54041856 | cg03499639  | ZNF331:alt-TSS-DMR1 | 0.563082  | 0.040008118   | 0.5230739 | 0.0180148 | 0.4690295 | 0.5771182 |
| 19 | 54041999 | cg25409185  | ZNF331:alt-TSS-DMR1 | 0.5353812 | 0.018523118   | 0.5168581 | 0.0344585 | 0.4134826 | 0.6202335 |
| 19 | 54042165 | cg15545827  | ZNF331:alt-TSS-DMR1 | 0.5841751 | 0.018508718   | 0.5656664 | 0.022078  | 0.4094325 | 0.6319003 |
| 19 | 54057208 | cg06860848  | ZNF331:alt-TSS-DMR2 | 0.5415506 | 0.013064209   | 0.5284864 | 0.0159111 | 0.480753  | 0.5762198 |
| 19 | 54057415 | cg03113572  | ZNF331:alt-TSS-DMR2 | 0.6217358 | 0.025963409   | 0.5957724 | 0.0172955 | 0.5438859 | 0.6476588 |
| 19 | 54057705 | cg19696891  | ZNF331:alt-TSS-DMR2 | 0.4597017 | 0.017346964   | 0.4423547 | 0.0229544 | 0.3734917 | 0.5112178 |
| 19 | 54058085 | cg20071427  | ZNF331:alt-TSS-DMR2 | 0.6032714 | 0.007832427   | 0.595439  | 0.0201831 | 0.5348898 | 0.6559822 |
| 19 | 57349204 | cg15473155  | PEG3:TSS-DMR        | 0.6082093 | -0.004762764  | 0.6129721 | 0.020736  | 0.5507642 | 0.67518   |
| 19 | 57349679 | cg19041006  | PEG3:TSS-DMR        | 0.6030949 | 0.011673109   | 0.5914218 | 0.0211014 | 0.5281177 | 0.6547259 |
| 19 | 57349709 | cg17663463  | PEG3:TSS-DMR        | 0.6515793 | 0.005722536   | 0.6458568 | 0.0147654 | 0.6015606 | 0.6901529 |
| 19 | 57349815 | cg19771589  | PEG3:TSS-DMR        | 0.5810561 | 0.0056748     | 0.5753813 | 0.0133477 | 0.5353382 | 0.6154244 |
| 19 | 57350004 | cg02793099  | PEG3:TSS-DMR        | 0.5593412 | 0.002823445   | 0.5565178 | 0.0163649 | 0.507423  | 0.6056125 |
| 19 | 57350096 | cg01656470  | PEG3:TSS-DMR        | 0.6571538 | 0.024323064   | 0.6328307 | 0.0182256 | 0.5781538 | 0.6875076 |
| 19 | 57350292 | cg27519373  | PEG3:TSS-DMR        | 0.7037165 | 0.029196282   | 0.6745202 | 0.0174091 | 0.622293  | 0.7267475 |
| 19 | 57350313 | cg18516833  | PEG3:TSS-DMR        | 0.7435693 | -0.003220173  | 0.7467895 | 0.0161973 | 0.6981976 | 0.7953814 |
| 19 | 57350503 | cg07310951  | PEG3:TSS-DMR        | 0.5572029 | 0.006103109   | 0.5465998 | 0.0199257 | 0.4868227 | 0.6063768 |
| 19 | 57350846 | cg10719746  | PEG3:TSS-DMR        | 0.671581  | 0.007652991   | 0.663928  | 0.0252992 | 0.5880303 | 0.7398257 |
| 19 | 57351213 | cg20897667  | PEG3:TSS-DMR        | 0.5875886 | -0.002915355  | 0.590504  | 0.0164873 | 0.5410422 | 0.6399657 |
| 19 | 57351322 | cg02478023  | PEG3:TSS-DMR        | 0.6108391 | 0.050291773   | 0.5605473 | 0.0246034 | 0.4867372 | 0.6343574 |
| 19 | 57351440 | cg22354595  | PEG3:TSS-DMR        | 0.5955085 | 0.011420645   | 0.5840879 | 0.0223625 | 0.5170003 | 0.6511754 |
| 19 | 57351642 | cg19335327  | PEG3:TSS-DMR        | 0.5867526 | 0.019531609   | 0.567221  | 0.0168082 | 0.5167963 | 0.6176457 |
| 19 | 57351791 | cg14849423  | PEG3:TSS-DMR        | 0.6352021 | 0.018096691   | 0.6171054 | 0.0133809 | 0.5769627 | 0.6572481 |
| 19 | 57352014 | cg15777825  | PEG3:TSS-DMR        | 0.5343242 | 0.016527955   | 0.5177962 | 0.019635  | 0.4588913 | 0.5767012 |
| 19 | 57352018 | cg10204755  | PEG3:TSS-DMR        | 0.595185  | 0.023439227   | 0.5717458 | 0.0184954 | 0.5162595 | 0.627232  |
| 19 | 57352021 | cg12205903  | PEG3:TSS-DMR        | 0.5212312 | 0.027179591   | 0.4940516 | 0.020458  | 0.4326776 | 0.5554256 |
| 19 | 57352074 | cg26349266  | PEG3:TSS-DMR        | 0.6014848 | 0.029829155   | 0.5716556 | 0.0161739 | 0.5231338 | 0.6201774 |
| 19 | 57352134 | cg02162069  | PEG3:TSS-DMR        | 0.5550399 | 0.030037845   | 0.5250021 | 0.011936  | 0.489194  | 0.5608101 |
| 19 | 57352142 | cg13960339  | PEG3:TSS-DMR        | 0.6208561 | 0.012101664   | 0.6087544 | 0.0157104 | 0.5616234 | 0.6558855 |
| 19 | 57352176 | cg13369939  | PEG3:TSS-DMR        | 0.6370822 | 0.015595436   | 0.6214868 | 0.0189211 | 0.5647234 | 0.6782501 |
| 19 | 57352185 | cg20628335  | PEG3:TSS-DMR        | 0.5574216 | 0.008490245   | 0.5489314 | 0.013336  | 0.5089234 | 0.5889393 |
| 19 | 57352252 | cg22294267  | PEG3:TSS-DMR        | 0.6463314 | 0.019949291   | 0.6263821 | 0.0138861 | 0.5847238 | 0.6680404 |
| 19 | 57352269 | cg19098268  | PEG3:TSS-DMR        | 0.6026353 | 0.033374545   | 0.5692608 | 0.0124172 | 0.5320092 | 0.6065123 |
| 19 | 57352465 | cg24844423  | PEG3:TSS-DMR        | 0.5988944 | -0.006736891  | 0.6056313 | 0.0218519 | 0.5400757 | 0.6711869 |
| 19 | 57352519 | cg15678121  | PEG3:TSS-DMR        | 0.6381742 | 0.0112412     | 0.626933  | 0.0195622 | 0.5682464 | 0.6856196 |
| 19 | 57352542 | cg12032885  | PEG3:TSS-DMR        | 0.4373327 | 0.001411009   | 0.4359217 | 0.0224683 | 0.3685167 | 0.5033267 |
| 19 | 57352584 | cg25458871  | PEG3:TSS-DMR        | 0.5961241 | 0.033706555   | 0.5624175 | 0.0144932 | 0.5189379 | 0.6058972 |
| 19 | 57352657 | cg18668753  | PEG3:TSS-DMR        | 0.6429652 | -0.394545E-06 | 0.6429691 | 0.0153512 | 0.5969156 | 0.6890227 |
| 19 | 57352686 | cg18706888  | PEG3:TSS-DMR        | 0.5971841 | -0.000316945  | 0.597501  | 0.0213221 | 0.5335348 | 0.6614673 |
| 19 | 57352723 | cg06652523  | PEG3:TSS-DMR        | 0.5899636 | 0.002635845   | 0.5873278 | 0.0131695 | 0.5478193 | 0.6268363 |
| 19 | 57352729 | cg01054891  | PEG3:TSS-DMR        | 0.4912651 | -0.024915764  | 0.5161809 | 0.0129786 | 0.4772451 | 0.5551167 |
| 19 | 57352746 | cg18644235  | PEG3:TSS-DMR        | 0.7269234 | -0.010160436  | 0.7370838 | 0.0161348 | 0.6886794 | 0.7854883 |
| 19 | 57352785 | cg13374648  | PEG3:TSS-DMR        | 0.5505705 | 0.001770582   | 0.5487999 | 0.0106557 | 0.5168327 | 0.5807672 |
| 19 | 57352807 | cg26917367  | PEG3:TSS-DMR        | 0.7008471 | -0.002292009  | 0.7031391 | 0.0201482 | 0.6426946 | 0.7635836 |
| 19 | 57353128 | cg22927979  | PEG3:TSS-DMR        | 0.7785191 | -0.004283955  | 0.7828031 | 0.0094499 | 0.7544534 | 0.8111527 |
| 20 | 30134929 | cg25359645  | MCTS2P:TSS-DMR      | 0.5053984 | 0.020692936   | 0.4847055 | 0.0194508 | 0.4263531 | 0.5430579 |
| 20 | 30134973 | cg24607140  | MCTS2P:TSS-DMR      | 0.6328614 | 0.026549082   | 0.6063123 | 0.0113989 | 0.5721155 | 0.6405091 |
| 20 | 30135108 | cg06000530  | MCTS2P:TSS-DMR      | 0.5559115 | 0.027477509   | 0.528434  | 0.0234498 | 0.4580845 | 0.5987835 |
| 20 | 30135124 | cg19617948  | MCTS2P:TSS-DMR      | 0.5653849 | 0.028227718   | 0.5371572 | 0.0285987 | 0.451361  | 0.6229534 |
| 20 | 30135144 | cg15815607  | MCTS2P:TSS-DMR      | 0.5442942 | 0.029429482   | 0.5148647 | 0.0233513 | 0.4448107 | 0.5849187 |
| 20 | 30135149 | cg25645178  | MCTS2P:TSS-DMR      | 0.4966886 | 0.0304221     | 0.4692665 | 0.0270991 | 0.3879691 | 0.5505639 |
| 20 | 30135158 | cg17840843  | MCTS2P:TSS-DMR      | 0.4362545 | 0.0296568     | 0.4065977 | 0.0284374 | 0.3212856 | 0.4919098 |
| 20 | 30135177 | cg02146091  | MCTS2P:TSS-DMR      | 0.535454  | 0.026969073   | 0.5084849 | 0.0275603 | 0.4258041 | 0.5911658 |
| 20 | 30135291 | cg14175568  | MCTS2P:TSS-DMR      | 0.5066389 | 0.015255055   | 0.4913838 | 0.0189318 | 0.4345883 | 0.5481794 |
| 20 | 30135362 | cg20129782  | MCTS2P:TSS-DMR      | 0.4731884 | 0.003233336   | 0.4699551 | 0.0168398 | 0.4194356 | 0.5204745 |
| 20 | 36148604 | cg23757721  | NNAT:TSS-DMR        | 0.6905107 | -0.020107727  | 0.7106184 | 0.0190106 | 0.6535866 | 0.6776503 |
| 20 | 36148615 | cg26083330  | NNAT:TSS-DMR        | 0.6509374 | -0.029627455  | 0.6805649 | 0.0125793 | 0.6428269 | 0.7183028 |
| 20 | 36148620 | cg22551578  | NNAT:TSS-DMR        | 0.5157267 | -0.035595809  | 0.5513225 | 0.0311995 | 0.4577239 | 0.6449211 |
| 20 | 36148642 | cg04489586  | NNAT:TSS-DMR        | 0.6385523 | -0.017470464  | 0.6560228 | 0.0161792 | 0.6074853 | 0.7045602 |
| 20 | 36148672 | cg23605670  | NNAT:TSS-DMR        | 0.5737346 | -0.006814064  | 0.5805487 | 0.0179221 | 0.5267824 | 0.6343149 |

|    |          |            |                    |           |              |           |           |           |           |
|----|----------|------------|--------------------|-----------|--------------|-----------|-----------|-----------|-----------|
| 20 | 36148679 | cg12862537 | NNAT:TSS-DMR       | 0.6267028 | -0.0094994   | 0.6362022 | 0.0254803 | 0.5597612 | 0.7126432 |
| 20 | 36148699 | cg10981598 | NNAT:TSS-DMR       | 0.5548803 | -0.017254627 | 0.5721349 | 0.0229191 | 0.5033777 | 0.6408922 |
| 20 | 36148738 | cg13790727 | NNAT:TSS-DMR       | 0.6748252 | -0.023936345 | 0.6987615 | 0.0212395 | 0.6350432 | 0.7624799 |
| 20 | 36148767 | cg20783699 | NNAT:TSS-DMR       | 0.6492836 | -0.021239073 | 0.6705227 | 0.024611  | 0.5966896 | 0.7443558 |
| 20 | 36148775 | cg25712981 | NNAT:TSS-DMR       | 0.7199719 | 0.007880027  | 0.7120919 | 0.0297321 | 0.6228955 | 0.8012883 |
| 20 | 36148779 | cg03615235 | NNAT:TSS-DMR       | 0.6935411 | -0.003498809 | 0.6970399 | 0.0279161 | 0.6132916 | 0.7807882 |
| 20 | 36148791 | cg17643025 | NNAT:TSS-DMR       | 0.694573  | 0.001057145  | 0.6935159 | 0.0277808 | 0.6101733 | 0.7768584 |
| 20 | 36148798 | cg24762053 | NNAT:TSS-DMR       | 0.8059922 | 0.010071964  | 0.7959202 | 0.0220833 | 0.7296704 | 0.8621701 |
| 20 | 36148803 | cg14469070 | NNAT:TSS-DMR       | 0.7278794 | 0.008746773  | 0.7191326 | 0.0235491 | 0.6484854 | 0.7897798 |
| 20 | 36148860 | cg22298088 | NNAT:TSS-DMR       | 0.7368586 | 0.007959891  | 0.7288987 | 0.0223356 | 0.661892  | 0.7959055 |
| 20 | 36148928 | cg22943498 | NNAT:TSS-DMR       | 0.6499147 | -0.006337573 | 0.6562523 | 0.0343651 | 0.553157  | 0.7593475 |
| 20 | 36148954 | cg14765818 | NNAT:TSS-DMR       | 0.6121187 | -0.014743545 | 0.6268622 | 0.0175986 | 0.5740664 | 0.6796581 |
| 20 | 36148961 | cg08402058 | NNAT:TSS-DMR       | 0.5706193 | -0.019993755 | 0.5906131 | 0.0213782 | 0.5264785 | 0.6547477 |
| 20 | 36148994 | cg15473473 | NNAT:TSS-DMR       | 0.6529029 | -0.004330973 | 0.6572339 | 0.0245514 | 0.5835797 | 0.7308881 |
| 20 | 36149013 | cg07156273 | NNAT:TSS-DMR       | 0.6826503 | -0.0117502   | 0.6944005 | 0.0289513 | 0.6075465 | 0.7812545 |
| 20 | 36149022 | cg01466133 | NNAT:TSS-DMR       | 0.6801257 | -0.002524118 | 0.6826498 | 0.0240715 | 0.6104355 | 0.7548642 |
| 20 | 36149053 | cg24338351 | NNAT:TSS-DMR       | 0.6480232 | -0.007545255 | 0.6555685 | 0.0173048 | 0.6036541 | 0.7074828 |
| 20 | 36149081 | cg24675557 | NNAT:TSS-DMR       | 0.6019981 | -0.014992436 | 0.6169905 | 0.0265152 | 0.5374449 | 0.6965362 |
| 20 | 36149112 | cg20479660 | NNAT:TSS-DMR       | 0.6456276 | -0.0024797   | 0.6481073 | 0.0241057 | 0.5757901 | 0.7024453 |
| 20 | 36149119 | cg22421148 | NNAT:TSS-DMR       | 0.654411  | -0.018463645 | 0.6728746 | 0.0256026 | 0.5960668 | 0.7496825 |
| 20 | 36149121 | cg22510412 | NNAT:TSS-DMR       | 0.6721243 | -0.012031755 | 0.6841561 | 0.0247663 | 0.609857  | 0.7584551 |
| 20 | 36149185 | cg03061677 | NNAT:TSS-DMR       | 0.6251003 | -0.007594318 | 0.6326946 | 0.0238318 | 0.5611991 | 0.7041902 |
| 20 | 36149188 | cg00576435 | NNAT:TSS-DMR       | 0.6403654 | 0.001154936  | 0.6392105 | 0.0191929 | 0.5816318 | 0.6967891 |
| 20 | 36149194 | cg18433380 | NNAT:TSS-DMR       | 0.6465437 | 0.000697391  | 0.6458463 | 0.0182273 | 0.5911645 | 0.7005281 |
| 20 | 36149231 | cg16648571 | NNAT:TSS-DMR       | 0.5094878 | -0.005458327 | 0.5149461 | 0.0241962 | 0.4423575 | 0.5875348 |
| 20 | 36149271 | cg04810287 | NNAT:TSS-DMR       | 0.5693906 | 0.027480509  | 0.5419101 | 0.0293572 | 0.4538384 | 0.6299818 |
| 20 | 36149452 | cg25962605 | NNAT:TSS-DMR       | 0.5997887 | 0.0123788    | 0.5874099 | 0.0148515 | 0.5428553 | 0.6319645 |
| 20 | 36149455 | cg21588305 | NNAT:TSS-DMR       | 0.7026039 | -0.0056553   | 0.7082592 | 0.0182398 | 0.6535397 | 0.7629787 |
| 20 | 36149656 | cg13708635 | NNAT:TSS-DMR       | 0.5295927 | -0.014686036 | 0.5442787 | 0.0143043 | 0.5013658 | 0.5871917 |
| 20 | 36149706 | cg11174847 | NNAT:TSS-DMR       | 0.5938357 | 0.000671355  | 0.5931643 | 0.0150913 | 0.5478906 | 0.6384381 |
| 20 | 36149750 | cg23566503 | NNAT:TSS-DMR       | 0.4669992 | -0.004222882 | 0.4712221 | 0.0198749 | 0.4115975 | 0.5308467 |
| 20 | 36150061 | cg10642330 | NNAT:TSS-DMR       | 0.5233772 | 0.062617909  | 0.4607593 | 0.0234971 | 0.3902679 | 0.5312507 |
| 20 | 42142417 | cg22457903 | L3MBTL:alt-TSS-DMR | 0.5502102 | 0.017065145  | 0.5331451 | 0.0172062 | 0.4815264 | 0.5847637 |
| 20 | 42142451 | cg20091959 | L3MBTL:alt-TSS-DMR | 0.583183  | 0.001538882  | 0.5816441 | 0.0143361 | 0.5386359 | 0.6246523 |
| 20 | 42142484 | cg17091610 | L3MBTL:alt-TSS-DMR | 0.5740963 | 0.0026746    | 0.5714217 | 0.0130694 | 0.5322136 | 0.6106298 |
| 20 | 42142494 | cg23626798 | L3MBTL:alt-TSS-DMR | 0.560655  | 0.017463982  | 0.543191  | 0.0386653 | 0.4271951 | 0.659187  |
| 20 | 42142559 | cg15388309 | L3MBTL:alt-TSS-DMR | 0.6145344 | 0.022799464  | 0.5917349 | 0.0176787 | 0.538699  | 0.6447709 |
| 20 | 42142596 | cg16862791 | L3MBTL:alt-TSS-DMR | 0.5506218 | 0.015635864  | 0.5349859 | 0.0144571 | 0.4916145 | 0.5783574 |
| 20 | 42142671 | cg06446163 | L3MBTL:alt-TSS-DMR | 0.5896057 | 0.016816882  | 0.5727888 | 0.0133767 | 0.5326588 | 0.6129188 |
| 20 | 42142673 | cg04984575 | L3MBTL:alt-TSS-DMR | 0.5906688 | 0.025138627  | 0.5649302 | 0.0191666 | 0.5074305 | 0.6224298 |
| 20 | 42142699 | cg02177317 | L3MBTL:alt-TSS-DMR | 0.6128479 | -0.002758927 | 0.6156068 | 0.0171822 | 0.5640602 | 0.6671535 |
| 20 | 42142751 | cg20529070 | L3MBTL:alt-TSS-DMR | 0.6098747 | 0.010181836  | 0.5996929 | 0.0162771 | 0.5508614 | 0.6485243 |
| 20 | 42142766 | cg10360552 | L3MBTL:alt-TSS-DMR | 0.5740174 | 0.017186627  | 0.5568308 | 0.019134  | 0.4994288 | 0.6142327 |
| 20 | 42142784 | cg18911945 | L3MBTL:alt-TSS-DMR | 0.5180553 | -0.019321127 | 0.5373764 | 0.0244259 | 0.4640986 | 0.6106542 |
| 20 | 42142847 | cg01877937 | L3MBTL:alt-TSS-DMR | 0.5706586 | 0.038080582  | 0.532578  | 0.0217112 | 0.4674445 | 0.5977115 |
| 20 | 42142852 | cg08633313 | L3MBTL:alt-TSS-DMR | 0.5835131 | 0.044131409  | 0.5393817 | 0.0223832 | 0.472232  | 0.6065313 |
| 20 | 42142897 | cg12699433 | L3MBTL:alt-TSS-DMR | 0.5680664 | 0.037084636  | 0.5309818 | 0.0259539 | 0.4531201 | 0.6088434 |
| 20 | 42142947 | cg11319028 | L3MBTL:alt-TSS-DMR | 0.5509655 | 0.015248691  | 0.5357168 | 0.0339455 | 0.4338803 | 0.6375533 |
| 20 | 42142995 | cg22601123 | L3MBTL:alt-TSS-DMR | 0.601235  | 0.038025655  | 0.5632093 | 0.0237115 | 0.4920749 | 0.6343438 |
| 20 | 42143015 | cg22330467 | L3MBTL:alt-TSS-DMR | 0.6316169 | 0.030540391  | 0.6010765 | 0.0338721 | 0.4994601 | 0.7026929 |
| 20 | 42143045 | cg14306330 | L3MBTL:alt-TSS-DMR | 0.5408382 | 0.068223855  | 0.4726143 | 0.0319324 | 0.3768173 | 0.5684114 |
| 20 | 42143080 | cg01071811 | L3MBTL:alt-TSS-DMR | 0.6518515 | 0.032318791  | 0.6195327 | 0.0302429 | 0.5288041 | 0.7102613 |
| 20 | 42143096 | cg02611863 | L3MBTL:alt-TSS-DMR | 0.6337061 | 0.032655164  | 0.6010509 | 0.0220061 | 0.5350326 | 0.6670692 |
| 20 | 42143174 | cg15330298 | L3MBTL:alt-TSS-DMR | 0.6752344 | 0.044238436  | 0.630996  | 0.0257285 | 0.5538105 | 0.7081815 |
| 20 | 42143211 | cg20252111 | L3MBTL:alt-TSS-DMR | 0.5645233 | 0.004054518  | 0.5604688 | 0.0157086 | 0.5133431 | 0.6075945 |
| 20 | 42143399 | cg15302378 | L3MBTL:alt-TSS-DMR | 0.6928797 | 0.031301091  | 0.6615786 | 0.021766  | 0.5962806 | 0.7268766 |
| 20 | 42143489 | cg09541000 | L3MBTL:alt-TSS-DMR | 0.6745273 | 0.041165755  | 0.6333615 | 0.0174246 | 0.5810877 | 0.6856354 |
| 20 | 42143502 | cg02472486 | L3MBTL:alt-TSS-DMR | 0.5831913 | 0.0277043    | 0.555487  | 0.022685  | 0.4874319 | 0.6235421 |
| 20 | 57414039 | cg04132853 | NESP-DMR           | 0.6220468 | -0.017099955 | 0.6391468 | 0.0209355 | 0.5763401 | 0.7019534 |
| 20 | 57414059 | cg25090051 | GNAS-NESP-DMR      | 0.6014206 | -0.014919918 | 0.6163405 | 0.0145724 | 0.5726235 | 0.6600576 |
| 20 | 57414162 | cg00732970 | GNAS-NESP-DMR      | 0.5380618 | -0.004490345 | 0.5425521 | 0.0161471 | 0.4941107 | 0.5909936 |
| 20 | 57414217 | cg17696847 | GNAS-NESP-DMR      | 0.5691358 | -0.0108309   | 0.5799667 | 0.0162091 | 0.5313394 | 0.628594  |
| 20 | 57414274 | cg23732978 | GNAS-NESP-DMR      | 0.6324916 | -0.026788164 | 0.6592798 | 0.0666336 | 0.4593791 | 0.8591805 |
| 20 | 57414351 | cg20019489 | GNAS-NESP-DMR      | 0.7351562 | -0.000619573 | 0.7357758 | 0.0213751 | 0.6716505 | 0.7999011 |
| 20 | 57414407 | cg02274728 | GNAS-NESP-DMR      | 0.6202478 | 0.003224127  | 0.6170237 | 0.0199318 | 0.5572283 | 0.6768191 |
| 20 | 57414529 | cg12054318 | GNAS-NESP-DMR      | 0.5959214 | 0.015654782  | 0.5802666 | 0.0176113 | 0.5274327 | 0.6331005 |
| 20 | 57414539 | cg25268451 | GNAS-NESP-DMR      | 0.6398569 | 0.019158209  | 0.6206987 | 0.0155887 | 0.5739325 | 0.6674649 |
| 20 | 57414578 | cg11996914 | GNAS-NESP-DMR      | 0.5486853 | -0.014902973 | 0.5635883 | 0.019157  | 0.5061173 | 0.6210593 |
| 20 | 57414596 | cg21330323 | GNAS-NESP-DMR      | 0.5082479 | -0.014722891 | 0.5229708 | 0.0181745 | 0.4684474 | 0.5774942 |
| 20 | 57414884 | cg06163629 | GNAS-NESP-DMR      | 0.523497  | -0.008833991 | 0.532331  | 0.0233533 | 0.4622712 | 0.6023908 |
| 20 | 57414960 | cg14597908 | GNAS-NESP-DMR      | 0.5542287 | 0.005518255  | 0.5487104 | 0.0106232 | 0.5168409 | 0.58058   |
| 20 | 57415144 | cg00765653 | GNAS-NESP-DMR      | 0.5918965 | -0.010777182 | 0.6026737 | 0.0198849 | 0.5430191 | 0.6623282 |
| 20 | 57415177 | cg14728235 | GNAS-NESP-DMR      | 0.5740691 | -0.020377227 | 0.5944463 | 0.012627  | 0.5565652 | 0.6323274 |
| 20 | 57415377 | cg05558390 | GNAS-NESP-DMR      | 0.394962  | -0.000814082 | 0.3957761 | 0.0254352 | 0.3194704 | 0.4720818 |
| 20 | 57415697 | cg19296354 | GNAS-NESP-DMR      | 0.5759394 | 0.007760791  | 0.5678326 | 0.0172849 | 0.5159778 | 0.6196875 |
| 20 | 57416221 | cg24975842 | GNAS-NESP-DMR      | 0.5099819 | -0.010977091 | 0.520959  | 0.0196585 | 0.4619834 | 0.5799346 |
| 20 | 57416506 | cg18619398 | GNAS-NESP-DMR      | 0.514245  | -0.005470291 | 0.5197153 | 0.0163223 | 0.4707484 | 0.5686822 |
| 20 | 57416888 | cg01355739 | GNAS-NESP-DMR      | 0.6309069 | 0.016857064  | 0.6140498 | 0.016698  | 0.563956  | 0.6641437 |
| 20 | 57417152 | cg00952145 | GNAS-NESP-DMR      | 0.4709794 | -0.002663082 | 0.4736425 | 0.0135378 | 0.4330292 | 0.5142558 |





|    |          |            |                   |           |              |           |           |           |           |
|----|----------|------------|-------------------|-----------|--------------|-----------|-----------|-----------|-----------|
| 20 | 57463397 | cg11357538 | GNAS A/B:TSS-DMR  | 0.5865278 | 0.069119909  | 0.5174079 | 0.016622  | 0.4675418 | 0.567274  |
| 20 | 57463455 | cg20008140 | GNAS A/B:TSS-DMR  | 0.6405765 | 0.077678527  | 0.562898  | 0.0297253 | 0.473722  | 0.652074  |
| 20 | 57463503 | cg11480267 | GNAS A/B:TSS-DMR  | 0.579989  | 0.0812745    | 0.4987145 | 0.0273571 | 0.4166432 | 0.5807858 |
| 20 | 57463527 | cg10011623 | GNAS A/B:TSS-DMR  | 0.5806833 | 0.106024582  | 0.4746587 | 0.0289443 | 0.3878257 | 0.5614917 |
| 20 | 57463530 | cg01748573 | GNAS A/B:TSS-DMR  | 0.6316016 | 0.111875973  | 0.5197256 | 0.028996  | 0.4327377 | 0.6067135 |
| 20 | 57463572 | cg17334845 | GNAS A/B:TSS-DMR  | 0.5488331 | 0.082302482  | 0.4665306 | 0.0186651 | 0.4105355 | 0.5225258 |
| 20 | 57463615 | cg26767990 | GNAS A/B:TSS-DMR  | 0.4957165 | 0.068278473  | 0.427438  | 0.0260822 | 0.3491914 | 0.5056847 |
| 20 | 57463653 | cg17652507 | GNAS A/B:TSS-DMR  | 0.5917841 | 0.124533218  | 0.4672509 | 0.0356124 | 0.3604135 | 0.5740882 |
| 20 | 57463658 | cg22407822 | GNAS A/B:TSS-DMR  | 0.6257529 | 0.128907291  | 0.4968456 | 0.0308636 | 0.4042547 | 0.5894365 |
| 20 | 57463711 | cg07341934 | GNAS A/B:TSS-DMR  | 0.6458454 | 0.094467664  | 0.5513777 | 0.0216416 | 0.4864528 | 0.6163026 |
| 20 | 57463713 | cg02107718 | GNAS A/B:TSS-DMR  | 0.611078  | 0.106862709  | 0.5042153 | 0.0220985 | 0.4379199 | 0.5705107 |
| 20 | 57463725 | cg23496597 | GNAS A/B:TSS-DMR  | 0.6149983 | 0.107239318  | 0.507759  | 0.033727  | 0.406578  | 0.60894   |
| 20 | 57463763 | cg25308079 | GNAS A/B:TSS-DMR  | 0.5716346 | 0.054343282  | 0.5172913 | 0.0165751 | 0.4675662 | 0.5670165 |
| 20 | 57463767 | cg03014008 | GNAS A/B:TSS-DMR  | 0.5691991 | 0.114401655  | 0.4547974 | 0.0332046 | 0.3551837 | 0.5544112 |
| 20 | 57463775 | cg09772382 | GNAS A/B:TSS-DMR  | 0.6088333 | 0.060551882  | 0.5482814 | 0.0210562 | 0.4851128 | 0.6114501 |
| 20 | 57463783 | cg15222215 | GNAS A/B:TSS-DMR  | 0.6031545 | 0.099462055  | 0.5036924 | 0.0269809 | 0.4227499 | 0.584635  |
| 20 | 57463787 | cg14263118 | GNAS A/B:TSS-DMR  | 0.6309674 | 0.083740445  | 0.547227  | 0.0274748 | 0.4648025 | 0.6296514 |
| 20 | 57463900 | cg11244758 | GNAS A/B:TSS-DMR  | 0.5590405 | 0.075731155  | 0.4833093 | 0.0181941 | 0.428727  | 0.5378917 |
| 20 | 57463903 | cg18160880 | GNAS A/B:TSS-DMR  | 0.6972638 | 0.106384055  | 0.5908797 | 0.0157392 | 0.5436623 | 0.6380972 |
| 20 | 57463906 | cg05926269 | GNAS A/B:TSS-DMR  | 0.7204542 | 0.103926782  | 0.6165274 | 0.0204813 | 0.5550835 | 0.6779713 |
| 20 | 57463925 | cg03821543 | GNAS A/B:TSS-DMR  | 0.5773746 | 0.102246082  | 0.4751285 | 0.0315248 | 0.3805542 | 0.5697028 |
| 20 | 57463974 | cg01538522 | GNAS A/B:TSS-DMR  | 0.4994116 | 0.075787373  | 0.4236242 | 0.0177339 | 0.3704226 | 0.4768258 |
| 20 | 57463984 | cg00267746 | GNAS A/B:TSS-DMR  | 0.4853348 | 0.068265318  | 0.4170695 | 0.0244197 | 0.3438103 | 0.4903286 |
| 20 | 57463991 | cg09885502 | GNAS A/B:TSS-DMR  | 0.6479617 | 0.118586727  | 0.529375  | 0.1538478 | 0.0678315 | 0.9909185 |
| 20 | 57464000 | cg03837903 | GNAS A/B:TSS-DMR  | 0.6361756 | 0.081965764  | 0.5542098 | 0.0224838 | 0.4867584 | 0.6216612 |
| 20 | 57464002 | cg23159236 | GNAS A/B:TSS-DMR  | 0.4338087 | 0.065954191  | 0.3678545 | 0.0292869 | 0.2799939 | 0.4557151 |
| 20 | 57464129 | cg22798925 | GNAS A/B:TSS-DMR  | 0.5854895 | 0.089198636  | 0.4962909 | 0.0247217 | 0.4221257 | 0.570456  |
| 20 | 57464571 | cg20126878 | GNAS A/B:TSS-DMR  | 0.57845   | 0.088301227  | 0.4901488 | 0.0181651 | 0.4356536 | 0.544644  |
| 20 | 57464742 | cg27027803 | GNAS A/B:TSS-DMR  | 0.6568602 | 0.108579473  | 0.5482807 | 0.0145132 | 0.504741  | 0.5918204 |
| 20 | 57464970 | cg08997444 | GNAS A/B:TSS-DMR  | 0.6925464 | 0.085562755  | 0.6069836 | 0.0181755 | 0.552457  | 0.6615103 |
| 20 | 57464973 | cg22639787 | GNAS A/B:TSS-DMR  | 0.7530596 | 0.100876364  | 0.6521832 | 0.0189655 | 0.5952869 | 0.7090796 |
| 20 | 57465123 | cg05960039 | GNAS A/B:TSS-DMR  | 0.4109491 | 0.0600113    | 0.3509378 | 0.0179682 | 0.2970331 | 0.4048425 |
| 20 | 57465125 | cg09604333 | GNAS A/B:TSS-DMR  | 0.4970074 | 0.0586078    | 0.4383996 | 0.0227285 | 0.370214  | 0.5065852 |
| 20 | 57465132 | cg06047881 | GNAS A/B:TSS-DMR  | 0.5090633 | 0.075973336  | 0.43309   | 0.0226619 | 0.3651042 | 0.5010757 |
| 20 | 57465139 | cg20018057 | GNAS A/B:TSS-DMR  | 0.5172144 | 0.075095827  | 0.4421186 | 0.0169548 | 0.391254  | 0.4929831 |
| 20 | 57465175 | cg10748817 | GNAS A/B:TSS-DMR  | 0.5876021 | 0.080959545  | 0.5066426 | 0.0322274 | 0.4099602 | 0.6033249 |
| 21 | 40757691 | cg00606841 | WRB:alt-TSS-DMR   | 0.5942925 | -0.007088136 | 0.6013806 | 0.0249619 | 0.5264949 | 0.6762663 |
| 21 | 40757750 | cg22858667 | WRB:alt-TSS-DMR   | 0.5902305 | -0.002822236 | 0.5930527 | 0.0159479 | 0.5452091 | 0.6408963 |
| 21 | 40757899 | cg26710963 | WRB:alt-TSS-DMR   | 0.5761603 | 0.007457482  | 0.5687028 | 0.0136069 | 0.527882  | 0.6095236 |
| 21 | 40758208 | cg09916765 | WRB:alt-TSS-DMR   | 0.4400557 | -0.025475236 | 0.4655309 | 0.0158322 | 0.4180342 | 0.5130277 |
| 22 | 42077939 | cg06781532 | SNU13:alt-TSS-DMR | 0.6637015 | 0.008965291  | 0.6547362 | 0.0210985 | 0.5914408 | 0.7180317 |
| 22 | 42078217 | cg18152773 | SNU13:alt-TSS-DMR | 0.5142947 | 0.0171296    | 0.4971651 | 0.0173987 | 0.4449691 | 0.5493611 |
| 22 | 42078330 | cg05871614 | SNU13:alt-TSS-DMR | 0.5680677 | 0.026000264  | 0.5420674 | 0.0168232 | 0.491598  | 0.5925369 |
| 22 | 42078365 | cg22083753 | SNU13:alt-TSS-DMR | 0.5255094 | 0.015569064  | 0.5099403 | 0.0173654 | 0.457844  | 0.5620367 |
| 22 | 42078388 | cg15284719 | SNU13:alt-TSS-DMR | 0.5150444 | 0.009306236  | 0.5057382 | 0.012883  | 0.467089  | 0.5443873 |
| 22 | 42078567 | cg08686092 | SNU13:alt-TSS-DMR | 0.5314486 | 0.032277264  | 0.4991713 | 0.0211169 | 0.4358205 | 0.5625221 |
| 22 | 42078707 | cg11677105 | SNU13:alt-TSS-DMR | 0.4597698 | 0.014998091  | 0.4447717 | 0.0396019 | 0.3259661 | 0.5635774 |

We calculated the average and standard deviation (SD) of  $\beta$ -value at each probe (CpG site) using leukocyte genomic DNA samples from 11 control subjects, and obtained the differences between the  $\beta$ -value of this patient and the average  $\beta$ -value of the control group ( $\Delta\beta$ ). The methylation pattern of each probe (CpG site) is interpreted as abnormal, when the  $|\Delta\beta|$  is  $> 3$  SD and  $> 0.05$ . When  $> 20\%$  of probes within a DMR showed abnormal methylation levels, the DMR is considered aberrantly methylated.

In the column of "Average" of this patient, the  $\beta$ -values above  $AVG + >3$  SD and  $< AVG - 3$  SD of the control subjects are written in red and blue, respectively.

In the column of " $\Delta\beta$ " of this patient, abnormal values are highlighted with different colors corresponding to those in figure 1B.



**Table S3** The results of microsatellite analysis

| Locus           | Position   | Mother  | Patient | Father  | Assesment                              |
|-----------------|------------|---------|---------|---------|----------------------------------------|
| <i>DI4S608</i>  | 14q12      | 205/213 | 205/209 | 209     | Biparental                             |
| <i>DI4S588</i>  | 14q23-24.1 | 114     | 114/122 | 114/122 | Biparental or paternal heterodisomy    |
| <i>DI4S617</i>  | 14q32.12   | 139/165 | 165     | 165/169 | Biparental or uniparental isodisomy    |
| <i>DI4S1006</i> | 14q32.2    | 126/134 | 126/134 | 126     | Biparental or maternal heterodisomy    |
| <i>DI4S985</i>  | 14q32.2    | 137     | 131/137 | 131/137 | Biparental or paternal heterodisomy    |
| <i>DI4S1010</i> | 14q32.33   | 144/148 | 144/148 | 144/148 | Biparental or uniparental heterodisomy |
| <i>DI4S292</i>  | 14q32.33   | 104/110 | 104/110 | 110     | Biparental or maternal heterodisomy    |

The overall findings indicate biparental origin of the chromosome 14 homologs in this patient.

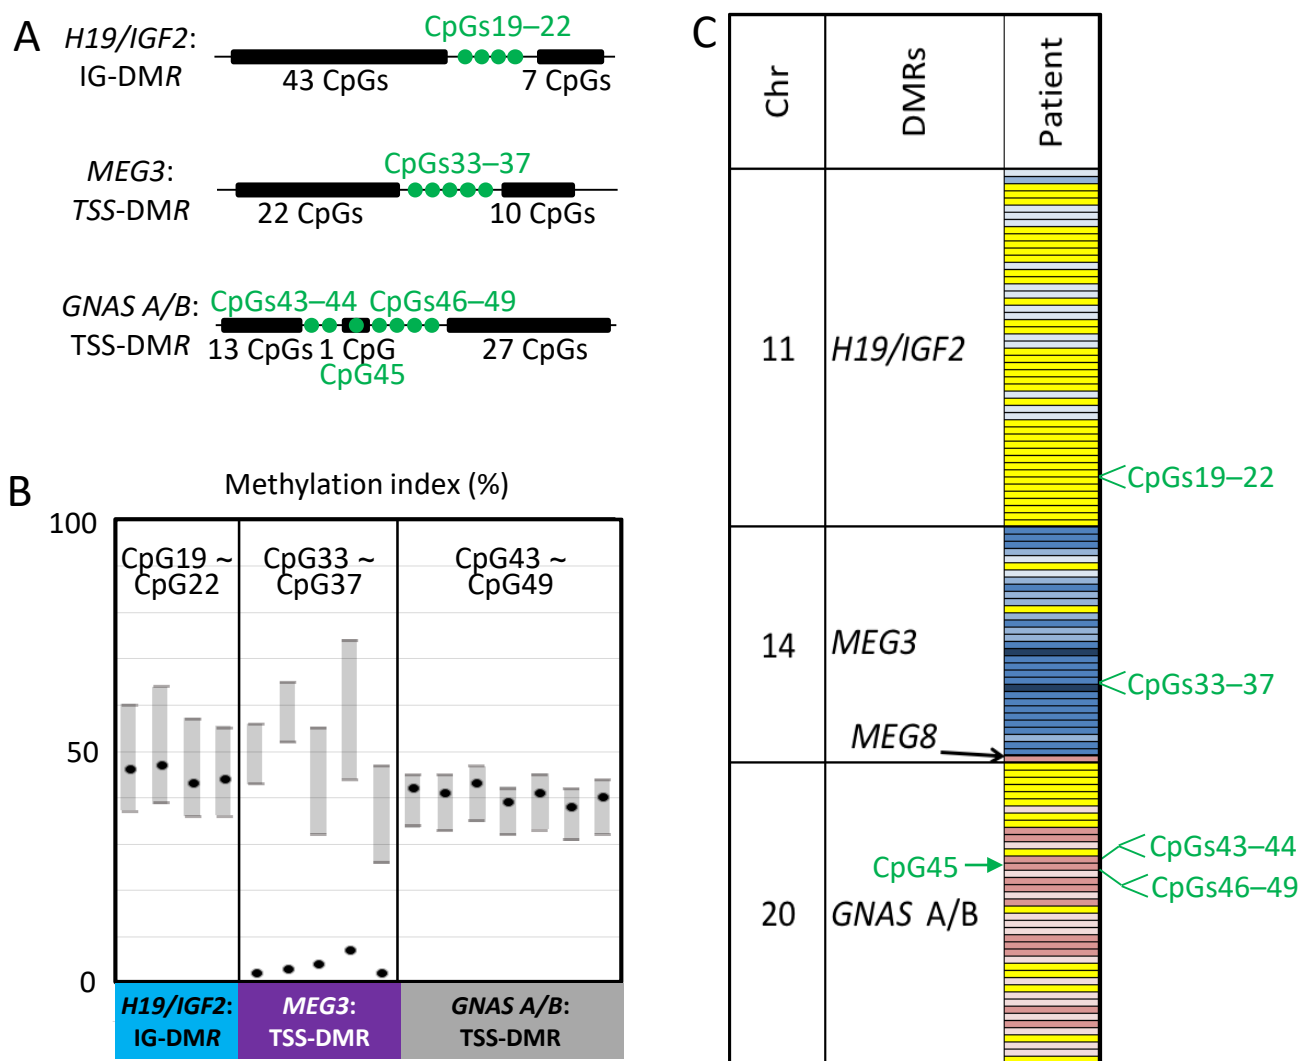

**Figure S1** Methylation analyses of the *H19/IGF2*:IG-DMR, *MEG3*:TSS-DMR, and *GNAS A/B*:TSS-DMR, using leukocyte gDNA samples.

- Schematic representation showing the relative positions of CpGs examined by pyrosequencing (green dots) and HumanMethylation450 BeadChip analysis (black bars).
- The results of pyrosequencing analysis.
- The results of HumanMethylation450 BeadChip analysis. The positions of CpGs examined by pyrosequencing are indicated. CpG45 has been examined by both analyses.

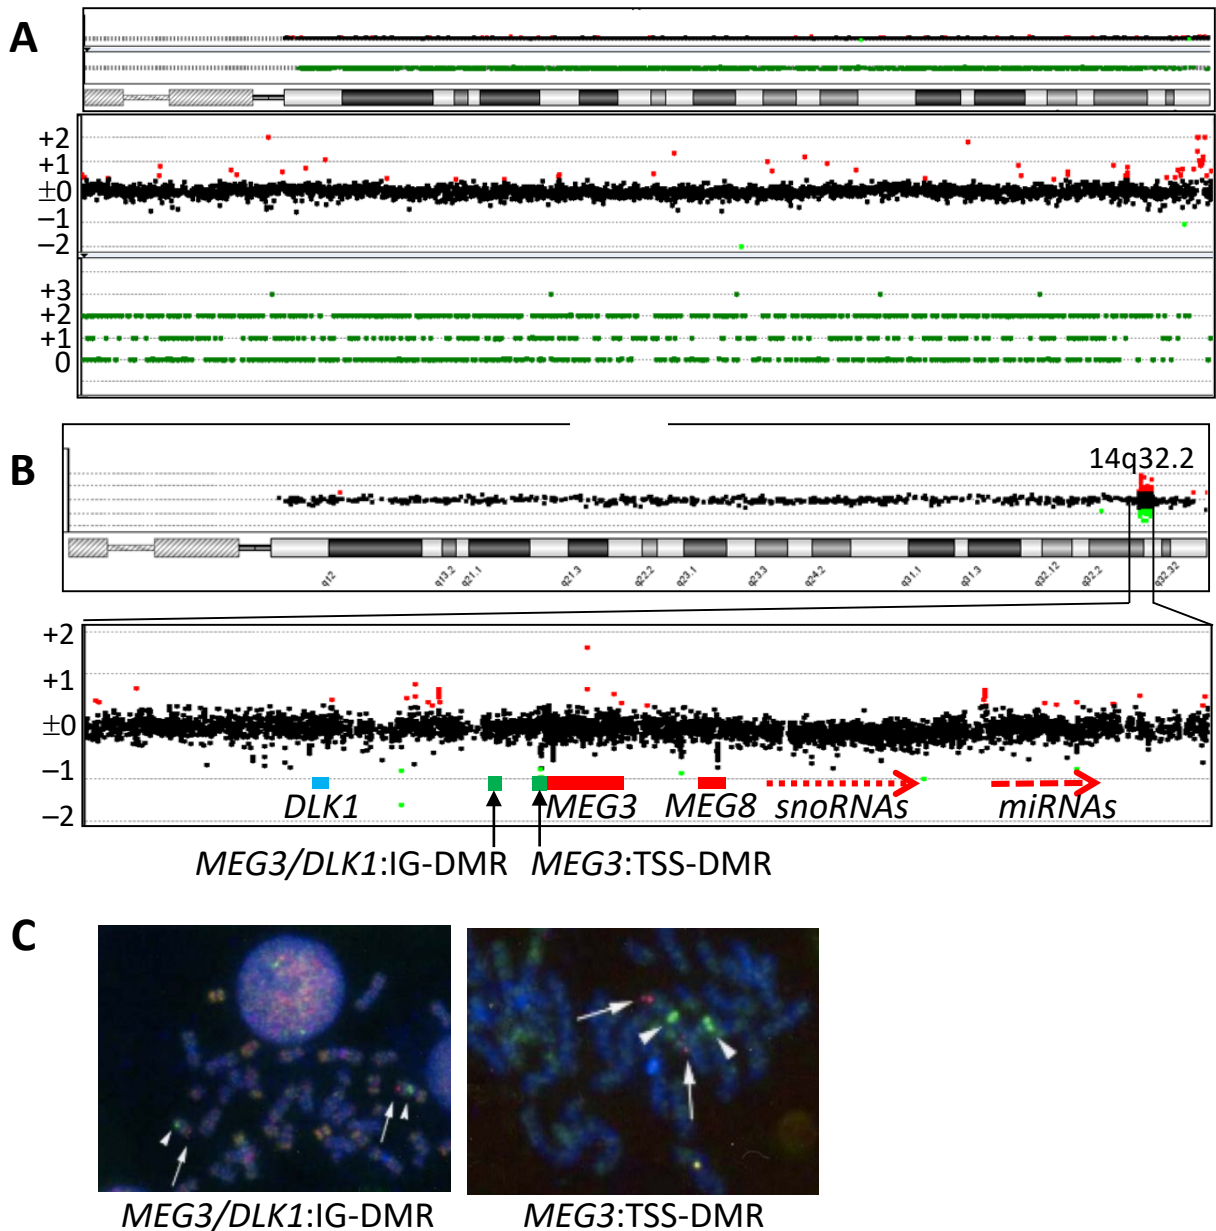

**Figure S2** Lack of UPD(14)mat and microdeletion in this patient.

A. The finding of CGH+SNP microarray.

B. The finding of a custom-build oligo-microarray for 14q32.2–q32.3.

C. FISH results for the *MEG3/DLK1:IG-DMR* and the *MEG3:TSS-DMR*. The red signals (arrows) have been detected by probes for the *MEG3/DLK1:IG-DMR* or *MEG3:TSS-DMR*, and the green signals (arrowheads) have been identified by an RP11-566I2 probe for 14q12 used as an internal control.

| Case description in the original papers | This case              | Pt.1               | Pt.3              | 18       | 21       | 23       | 29       | 31       | 32       | 34       | 35        | 36       | 37                          | 1         | 13        | BWS-102  | BWS-s001 | BWS-s011 | BWS-s023 | BWS-s062 | BWS-s113 | BWS-s015 | BWS-s064 | OGS 1000 | OGS 1052 |
|-----------------------------------------|------------------------|--------------------|-------------------|----------|----------|----------|----------|----------|----------|----------|-----------|----------|-----------------------------|-----------|-----------|----------|----------|----------|----------|----------|----------|----------|----------|----------|----------|
| Reference                               | SRS                    | PWS                | SRS               | BWS      | SRS      | BWS      | BWS      | SRS      | BWS      | SRS      | SRS       | PHP1b    | SRS-like                    | SRS       | SRS       | BWS      | BWS      | BWS      | BWS      | BWS      | BWS      | BWS      | BWS      | BWS      | BWS      |
| Clinical phenotype                      | MEG3                   | MEG3/DLK1          | MEG3/DLK1         | KCNQ1OT1 | H19/IGF2 | KCNQ1OT1 | KCNQ1OT1 | KCNQ1OT1 | KCNQ1OT1 | KCNQ1OT1 | Uncertain | GNAS A/B | H19/IGF2                    | MEG3/DLK1 | MEG3/DLK1 | KCNQ1OT1 | KCNQ1OT1 | KCNQ1OT1 | KCNQ1OT1 | KCNQ1OT1 | KCNQ1OT1 | H19/IGF2 | H19/IGF2 | KCNQ1OT1 | KCNQ1OT1 |
| Disease-causing epimutated DMR          | MEG3                   | MEG3/DLK1          | MEG3/DLK1         | KCNQ1OT1 | H19/IGF2 | KCNQ1OT1 | KCNQ1OT1 | KCNQ1OT1 | KCNQ1OT1 | KCNQ1OT1 | Uncertain | GNAS A/B | H19/IGF2                    | MEG3/DLK1 | MEG3/DLK1 | KCNQ1OT1 | KCNQ1OT1 | KCNQ1OT1 | KCNQ1OT1 | KCNQ1OT1 | KCNQ1OT1 | H19/IGF2 | H19/IGF2 | KCNQ1OT1 | KCNQ1OT1 |
| Methylation analysis methods            | Illumina 450K BeadChip |                    |                   |          |          |          |          |          |          |          |           |          | MALDI-TOF MS Pyrosequencing |           |           |          |          |          |          |          |          |          |          |          |          |
| DMR*                                    | Chr                    | Methylated allele* | Character of DMR* |          |          |          |          |          |          |          |           |          |                             |           |           |          |          |          |          |          |          |          |          |          |          |
| PPIE:Ex1-DMR                            | 1                      | Maternal           | O gDMR            |          |          |          |          |          |          |          |           |          |                             |           |           |          |          |          |          |          |          |          |          |          |          |
| DIRA53:TSS-DMR                          | 1                      | Maternal           | O gDMR            |          |          |          |          |          |          |          |           |          |                             |           |           |          |          |          |          |          |          |          |          |          |          |
| DIRA53:Ex2-DMR                          | 1                      | Maternal           | O gDMR            |          |          |          |          |          |          |          |           |          |                             |           |           |          |          |          |          |          |          |          |          |          |          |
| ZDFZ/GPR1:IG-DMR                        | 2                      | Paternal           | Sp gDMR-Sec DMR   |          |          |          |          |          |          |          |           |          |                             |           |           |          |          |          |          |          |          |          |          |          |          |
| MAP1L5:TSS-DMR                          | 4                      | Maternal           | O gDMR            |          |          |          |          |          |          |          |           |          |                             |           |           |          |          |          |          |          |          |          |          |          |          |
| FAI50B:TSS-DMR                          | 6                      | Maternal           | O gDMR            |          |          |          |          |          |          |          |           |          |                             |           |           |          |          |          |          |          |          |          |          |          |          |
| PLAGL1:alt-TSS-DMR                      | 6                      | Maternal           | O gDMR            |          |          |          |          |          |          |          |           |          |                             |           |           |          |          |          |          |          |          |          |          |          |          |
| IGF2R:int2-DMR                          | 6                      | Maternal           | O gDMR            |          |          |          |          |          |          |          |           |          |                             |           |           |          |          |          |          |          |          |          |          |          |          |
| WDR27:int13-DMR                         | 6                      | Maternal           | O gDMR            |          |          |          |          |          |          |          |           |          |                             |           |           |          |          |          |          |          |          |          |          |          |          |
| GRB10:alt-TSS-DMR                       | 7                      | Maternal           | O gDMR            |          |          |          |          |          |          |          |           |          |                             |           |           |          |          |          |          |          |          |          |          |          |          |
| PEG10:TSS-DMR                           | 7                      | Maternal           | O gDMR            |          |          |          |          |          |          |          |           |          |                             |           |           |          |          |          |          |          |          |          |          |          |          |
| MEG3:alt-TSS-DMR                        | 7                      | Maternal           | O gDMR            |          |          |          |          |          |          |          |           |          |                             |           |           |          |          |          |          |          |          |          |          |          |          |
| HTR5A:TSS-DMR                           | 7                      | Maternal           | O gDMR            |          |          |          |          |          |          |          |           |          |                             |           |           |          |          |          |          |          |          |          |          |          |          |
| ERL1J2:int6-DMR                         | 8                      | Maternal           | O gDMR            |          |          |          |          |          |          |          |           |          |                             |           |           |          |          |          |          |          |          |          |          |          |          |
| PEG13:TSS-DMR                           | 8                      | Maternal           | O gDMR            |          |          |          |          |          |          |          |           |          |                             |           |           |          |          |          |          |          |          |          |          |          |          |
| INPP5F:int2-DMR                         | 10                     | Maternal           | O gDMR            |          |          |          |          |          |          |          |           |          |                             |           |           |          |          |          |          |          |          |          |          |          |          |
| H19/IGF2:IG-DMR                         | 11                     | Paternal           | Sp gDMR           |          |          |          |          |          |          |          |           |          |                             |           |           |          |          |          |          |          |          |          |          |          |          |
| IGF2:Ex9-DMR                            | 11                     | Paternal           | Sec DMR           |          |          |          |          |          |          |          |           |          |                             |           |           |          |          |          |          |          |          |          |          |          |          |
| IGF2:alt-TSS-DMR                        | 11                     | Paternal           | Sp gDMR           |          |          |          |          |          |          |          |           |          |                             |           |           |          |          |          |          |          |          |          |          |          |          |
| KCNQ1OT1:TSS-DMR                        | 11                     | Maternal           | O gDMR            |          |          |          |          |          |          |          |           |          |                             |           |           |          |          |          |          |          |          |          |          |          |          |
| RBI:int2-DMR                            | 13                     | Maternal           | O gDMR            |          |          |          |          |          |          |          |           |          |                             |           |           |          |          |          |          |          |          |          |          |          |          |
| MEG3/DLK1:IG-DMR                        | 14                     | Paternal           | Sp gDMR           |          |          |          |          |          |          |          |           |          |                             |           |           |          |          |          |          |          |          |          |          |          |          |
| MEG3:TSS-DMR                            | 14                     | Paternal           | Sec DMR           |          |          |          |          |          |          |          |           |          |                             |           |           |          |          |          |          |          |          |          |          |          |          |
| MEG8:int2-DMR                           | 14                     | Maternal           | Sec DMR           |          |          |          |          |          |          |          |           |          |                             |           |           |          |          |          |          |          |          |          |          |          |          |
| MKRN3:TSS-DMR                           | 15                     | Maternal           | O gDMR-SecDMR     |          |          |          |          |          |          |          |           |          |                             |           |           |          |          |          |          |          |          |          |          |          |          |
| MAGEL2:TSS-DMR                          | 15                     | Maternal           | Sec DMR           |          |          |          |          |          |          |          |           |          |                             |           |           |          |          |          |          |          |          |          |          |          |          |
| NDN:TSS-DMR                             | 15                     | Maternal           | Sec DMR           |          |          |          |          |          |          |          |           |          |                             |           |           |          |          |          |          |          |          |          |          |          |          |
| SNRPN:alt-TSS-DMR                       | 15                     | Maternal           | Sec DMR           |          |          |          |          |          |          |          |           |          |                             |           |           |          |          |          |          |          |          |          |          |          |          |
| SNURF:TSS-DMR                           | 15                     | Maternal           | O gDMR            |          |          |          |          |          |          |          |           |          |                             |           |           |          |          |          |          |          |          |          |          |          |          |
| IGF1R:int2-DMR                          | 15                     | Maternal           | O gDMR            |          |          |          |          |          |          |          |           |          |                             |           |           |          |          |          |          |          |          |          |          |          |          |
| ZNF597:3' DMR                           | 16                     | Maternal           | O gDMR            |          |          |          |          |          |          |          |           |          |                             |           |           |          |          |          |          |          |          |          |          |          |          |
| ZNF597:TSS-DMR                          | 16                     | Paternal           | Sec DMR           |          |          |          |          |          |          |          |           |          |                             |           |           |          |          |          |          |          |          |          |          |          |          |
| ZNF331:alt-TSS-DMR1                     | 19                     | Maternal           | O gDMR            |          |          |          |          |          |          |          |           |          |                             |           |           |          |          |          |          |          |          |          |          |          |          |
| ZNF331:alt-TSS-DMR2                     | 19                     | Maternal           | O gDMR            |          |          |          |          |          |          |          |           |          |                             |           |           |          |          |          |          |          |          |          |          |          |          |
| PEG3:TSS-DMR                            | 19                     | Maternal           | O gDMR            |          |          |          |          |          |          |          |           |          |                             |           |           |          |          |          |          |          |          |          |          |          |          |
| INAT:TSS-DMR                            | 20                     | Maternal           | O gDMR            |          |          |          |          |          |          |          |           |          |                             |           |           |          |          |          |          |          |          |          |          |          |          |
| INAT2:TSS-DMR                           | 20                     | Maternal           | O gDMR            |          |          |          |          |          |          |          |           |          |                             |           |           |          |          |          |          |          |          |          |          |          |          |
| L3MBTL1:alt-TSS-DMR                     | 20                     | Maternal           | O gDMR            |          |          |          |          |          |          |          |           |          |                             |           |           |          |          |          |          |          |          |          |          |          |          |
| GNAS-MESP:TSS-DMR                       | 20                     | Paternal           | Sec DMR           |          |          |          |          |          |          |          |           |          |                             |           |           |          |          |          |          |          |          |          |          |          |          |
| GNAS-AS1:TSS-DMR                        | 20                     | Maternal           | O gDMR            |          |          |          |          |          |          |          |           |          |                             |           |           |          |          |          |          |          |          |          |          |          |          |
| GNAS-XL:Ex1-DMR                         | 20                     | Maternal           | O gDMR            |          |          |          |          |          |          |          |           |          |                             |           |           |          |          |          |          |          |          |          |          |          |          |
| GNAS A/B:TSS-DMR                        | 20                     | Maternal           | Sec DMR           |          |          |          |          |          |          |          |           |          |                             |           |           |          |          |          |          |          |          |          |          |          |          |
| WRB:alt-TSS-DMR                         | 21                     | Maternal           | O gDMR            |          |          |          |          |          |          |          |           |          |                             |           |           |          |          |          |          |          |          |          |          |          |          |
| SNURF:alt-TSS-DMR                       | 22                     | Maternal           | O gDMR            |          |          |          |          |          |          |          |           |          |                             |           |           |          |          |          |          |          |          |          |          |          |          |

**Figure S3** Representative data in patients with both hypomethylation-type and hypermethylation-type of MLID in the absence of a mutation in causative or candidate genes for MLID.

\* We have adopted Standardized nomenclature for imprinted loci/differentially methylated region in web site of European Network for Human Congenital Imprinting Disorders (<http://www.imprinting-disorders.eu/>).

The blue, red, and green boxes represent DMRs assessed to be hypomethylated, hypermethylated, and normally methylated, respectively, by the methods employed in each case; the gray boxes indicate non-examined DMRs.

Abbreviations: O gDNA: Oocyte germline DMR, Sp gDMR: Sperm germline DMR, Sec-DMR: Secondary DMR, SRS: Silver-Russell syndrome, BWS: Beckwith-Wiedemann syndrome, PHP1b: Pseudohypoparathyroidism 1b, TNDM: Transient neonatal diabetes mellitus, ASMM RTQ-PCR: TaqMan allele-specific methylated multiplex real-time quantitative PCR, and MALDI-TOF MS: Matrix Assisted Laser Desorption Ionization-Time of Flight Mass Spectrometry.

References

1. Kagami M, Matsubara K, Nakabayashi K, Nakamura A, Sano S, Okamura K, et al. Genome-wide multilocus imprinting disturbance analysis in Temple syndrome and Kagami-Ogata syndrome. *Genet Med.* 2017;19:476–82.
2. Bens S, Kolarova J, Beygo J, Buiting K, Caliebe A, Eggemann T, et al. Phenotypic spectrum and extent of DNA methylation defects associated with multilocus imprinting disturbances. *Epigenomics.* 2016;8:801–16.
3. Geoffron S, Abi Habib W, Chantot-Bastaraud S, Dubern B, Steunou V, Azzi S, Afejar A, et al. Chromosome 14q32.2 Imprinted Region Disruption as an Alternative Molecular Diagnosis of Silver-Russell Syndrome. *J Clin Endocrinol Metab.* 2018;103:2436–46.
4. Maeda T, Higashimoto K, Jozaki K, Yatsuki H, Nakabayashi K, Makita Y, et al. Comprehensive and quantitative multilocus methylation analysis reveals the susceptibility of specific imprinted differentially methylated regions to aberrant methylation in Beckwith-Wiedemann syndrome with epimutations. *Genet Med.* 2014;16:903–12.
5. Court F, Martin-Trujillo A, Romanelli V, Garin I, Iglesias-Platas I, Salafsky I, et al. Genome-wide allelic methylation analysis reveals disease-specific susceptibility to multiple methylation defects in imprinting syndromes. *Hum Mutat.* 2013;34:595–602.
